# Supplementary material
Source: PubMed Central journal article supplement (PMC3372923)
Supplement: NIHMS380216-supplement-Supplemental_Tables_1-3.pdf [file NIHMS380216-supplement-Supplemental_Tables_1-3.pdf]

Table S1: All significantly changed probe sets resulting from SAM analysis of NM vs WT comparisons in different muscle types.

| Affy ID#    | Fold Change | Gene Name                                                                             | Gene Symbol   |
|-------------|-------------|---------------------------------------------------------------------------------------|---------------|
| 98616_f_at  | 10.76       | myosin, heavy polypeptide 7, cardiac muscle, beta                                     | Myh7          |
| 93050_at    | 10.62       | myosin light chain, phosphorylatable, cardiac ventricles                              | Myhpc         |
| 97786_at    | 8.68        | ankyrin repeat domain 2 (stretch responsive muscle)                                   | Ankrd2        |
| 101063_at   | 7.91        | troponin C, cardiac/slow skeletal                                                     | Tncc          |
| 161361_s_at | 7.02        | troponin T1, skeletal, slow                                                           | Tnnt1         |
| 103084_at   | 5.55        | cysteine-rich protein 3                                                               | Csrp3         |
| 99570_s_at  | 3.76        | ATPase, Ca++ transporting, cardiac muscle, slow twitch 2                              | Atp2a2        |
| 98596_s_at  | 3.69        | sialyltransferase 9 (CMP-NeuAc:lactosylceramide alpha-2,3-sialyltransferase)          | Siat9         |
| 161045_at   | 3.50        | leucine rich repeat protein 1, neuronal                                               | Lrrn1         |
| 98561_at    | 3.47        | troponin I, skeletal, slow 1                                                          | Tnni1         |
| 100554_at   | 3.00        | PDZ and LIM domain 1 (elfin)                                                          | Pdlim1        |
| 97844_at    | 2.99        | regulator of G-protein signaling 2                                                    | Rgs2          |
| 94427_at    | 2.93        | coatomer protein complex, subunit gamma 1                                             | Copg1         |
| 103526_at   | 2.54        | peptidyl arginine deiminase, type II                                                  | Padi2         |
| 102213_at   | 2.38        | cardiac morphogenesis                                                                 | Xin           |
| 102378_at   | 2.29        | sarcospan                                                                             | Sspn          |
| 100472_at   | 2.21        | enabled homolog (Drosophila)                                                          | Enah          |
| 98553_at    | 2.17        | sarcolemma associated protein                                                         | Smap          |
| 160913_at   | 2.16        | nebulin-related anchoring protein                                                     | Nrap          |
| 95620_at    | 2.14        | RIKEN cDNA 2310016E22 gene                                                            | 2310016E22Rik |
| 161980_f_at | 2.12        | Bcl2-associated athanogene 3                                                          | Bag3          |
| 103824_at   | 2.12        | Wolfram syndrome 1 homolog (human)                                                    | Wfs1          |
| 95462_at    | 2.06        | basic leucine zipper and W2 domains 2                                                 | Bzw2          |
| 100555_at   | 2.04        | Down syndrome critical region homolog 1 (human)                                       | Dscr1         |
| 93053_at    | 2.04        | calsequestrin 2                                                                       | Casq2         |
| 160801_at   | 2.01        | RIKEN cDNA 2310009N05 gene                                                            | 2310009N05Rik |
| 95531_at    | 1.97        | RIKEN cDNA E230009N18 gene                                                            | E230009N18Rik |
| 93315_at    | 1.96        | mitogen activated protein kinase kinase 3                                             | Map2k3        |
| 103483_at   | 1.96        | excision repair cross-complementing rodent repair deficiency, complementation group 5 | Erc5          |
| 95703_at    | 1.95        | ubiquitin-like 1 (sentrin) activating enzyme E1A                                      | Uble1a        |
| 94536_s_at  | 1.94        | RIKEN cDNA 2900073G15 gene                                                            | 2900073G15Rik |
| 98402_at    | 1.92        | Fas-associated factor 1                                                               | Faf1          |
| 104342_i_at | 1.92        | RIKEN cDNA 2310004B05 gene                                                            | 2310004B05Rik |
| 95282_at    | 1.90        | heat shock protein, 1                                                                 | Hsp86-1       |
| 104305_at   | 1.88        | RIKEN cDNA 1500002I10 gene                                                            | 1500002I10Rik |
| 97386_at    | 1.85        | expressed sequence AI430822                                                           | AI430822      |
| 104634_at   | 1.84        | LIM and senescent cell antigen-like domains 1                                         | Lims1         |
| 101484_at   | 1.83        | next to the Brca1                                                                     | Nbr1          |
| 100912_at   | 1.82        | RIKEN cDNA 2410012M04 gene                                                            | 2410012M04Rik |
| 93836_at    | 1.82        | BCL2/adenovirus E1B 19 kDa-interacting protein 1, NIP3                                | Bnip3         |
| 96217_at    | 1.82        | polymerase (DNA directed), beta                                                       | Polb          |
| 97395_at    | 1.81        | DNA segment, Chr 19, Wayne State University 55, expressed                             | D19Wsu55e     |
| 93768_f_at  | 1.80        | origin recognition complex, subunit 3-like (S. cerevisiae)                            | Orc3l         |
| 96075_at    | 1.80        | WD repeat domain 1                                                                    | Wdr1          |
| 102714_at   | 1.80        | heat shock protein 1-like                                                             | Hspa1l        |
| 97369_g_at  | 1.80        | A kinase (PRKA) anchor protein 1                                                      | Akap1         |
| 96167_at    | 1.79        | Bcl2-associated athanogene 3                                                          | Bag3          |
| 92794_f_at  | 1.78        | expressed in non-metastatic cells 1, protein (NM23A) (nucleoside diphosphate kinase)  | Nme1          |
| 95010_at    | 1.78        | Tnf receptor-associated factor 3                                                      | Traf3         |
| 93767_i_at  | 1.77        | origin recognition complex, subunit 3-like (S. cerevisiae)                            | Orc3l         |
| 94954_at    | 1.76        | DNA segment, Chr 5, ERATO Doi 249, expressed                                          | D5Erttd249e   |
| 94066_at    | 1.75        | ring finger protein 14                                                                | Rnf14         |
| 100636_at   | 1.74        | eukaryotic translation initiation factor 4E binding protein 1                         | Eif4ebp1      |
| 92857_at    | 1.74        | ribosomal protein L22                                                                 | Rpl22         |
| 104110_at   | 1.74        | cDNA sequence BC031407                                                                | BC031407      |
| 93562_at    | 1.73        | RIKEN cDNA 2700033I16 gene                                                            | 2700033I16Rik |
| 160449_at   | 1.72        | down-regulator of transcription 1                                                     | Dr1           |
| 95618_at    | 1.72        | DNA segment, Chr 6, ERATO Doi 32, expressed                                           | D6Erttd32e    |
| 97242_at    | 1.72        | RIKEN cDNA 0610010O12 gene                                                            | 0610010O12Rik |
| 160683_at   | 1.72        | RIKEN cDNA C330005L02 gene                                                            | C330005L02Rik |

|             |      |                                                                                                                                                                        |               |
|-------------|------|------------------------------------------------------------------------------------------------------------------------------------------------------------------------|---------------|
| 103574_at   | 1.72 | Mus musculus, clone IMAGE:5401801, mRNA                                                                                                                                |               |
| 160335_at   | 1.72 | glutamate-cysteine ligase , modifier subunit                                                                                                                           | Gclm          |
| 93590_at    | 1.71 | RIKEN cDNA 1200015G06 gene                                                                                                                                             | 1200015G06Rik |
| 160614_at   | 1.69 | phosphatase and tensin homolog                                                                                                                                         | Pten          |
| 94299_at    | 1.68 | RIKEN cDNA 2310042E05 gene                                                                                                                                             | 2310042E05Rik |
| 160607_at   | 1.68 | par-3 (partitioning defective 3) homolog (C. elegans)                                                                                                                  | Pard3         |
| 94366_at    | 1.68 | RIKEN cDNA 2310079N02 gene                                                                                                                                             | 2310079N02Rik |
| 96802_at    | 1.68 | programmed cell death protein 7                                                                                                                                        | Pdcd7         |
| 99641_at    | 1.67 | DNA segment, Chr 2, Brigham & Women's Genetics 0891 expressed                                                                                                          | D2Bwg0891e    |
| 95044_at    | 1.67 | endothelial-derived gene                                                                                                                                               | Eg1-pending   |
| 104311_at   | 1.67 | RIKEN cDNA 1300013G12 gene                                                                                                                                             | 1300013G12Rik |
| 101002_at   | 1.67 | ornithine decarboxylase antizyme inhibitor                                                                                                                             | Oazin         |
| 98024_at    | 1.66 | nuclear transcription factor-Y beta                                                                                                                                    | Nfyb          |
| 104378_at   | 1.66 | paraoxonase 2                                                                                                                                                          | Pon2          |
| 96288_at    | 1.66 | RIKEN cDNA 3110038B19 gene                                                                                                                                             | 3110038B19Rik |
| 101367_at   | 1.66 | dynactin 1                                                                                                                                                             | Dctn1         |
| 95129_at    | 1.65 | nuclear receptor co-repressor 2                                                                                                                                        | Ncor2         |
| 95626_at    | 1.65 | xeroderma pigmentosum, complementation group C                                                                                                                         | Xpc           |
| 97309_at    | 1.64 | RIKEN cDNA 3110002K08 gene                                                                                                                                             | 3110002K08Rik |
| 102032_at   | 1.64 | twisted gastrulation protein                                                                                                                                           | Twg-pending   |
| 104739_at   | 1.64 | RIKEN cDNA 9130410M22 gene                                                                                                                                             | 9130410M22Rik |
| 104070_at   | 1.64 | p300/CBP-associated factor                                                                                                                                             | Pcaf          |
| 94040_at    | 1.64 | enhancer of rudimentary homolog (Drosophila)                                                                                                                           | Erh           |
| 98476_at    | 1.63 | ankyrin 3, epithelial                                                                                                                                                  | Ank3          |
| 97932_f_at  | 1.62 | CD151 antigen                                                                                                                                                          | Cd151         |
| 98547_at    | 1.62 | mitochondrial ribosomal protein S12                                                                                                                                    | Mrps12        |
| 98059_s_at  | 1.62 | lamin A                                                                                                                                                                | Lmna          |
| 104046_at   | 1.62 | ariadne ubiquitin-conjugating enzyme E2 binding protein homolog 1 (Drosophila)                                                                                         | Arih1         |
| 98451_at    | 1.61 | DnaJ (Hsp40) homolog, subfamily B, member 10                                                                                                                           | Dnajb10       |
| 102265_at   | 1.61 | myogenic factor 6                                                                                                                                                      | Myf6          |
| 97817_at    | 1.61 | small protein effector 1 of Cdc42                                                                                                                                      | Spec1-pending |
| 96876_at    | 1.61 | lysosomal-associated protein transmembrane 4A                                                                                                                          | Laptm4a       |
| 104076_at   | 1.61 | RIKEN cDNA 1190017O12 gene                                                                                                                                             | 1190017O12Rik |
| 93011_at    | 1.61 | gamma-aminobutyric acid (GABA(A)) receptor-associated protein-like 1                                                                                                   | Gabarapl1     |
| 93261_at    | 1.60 | legumain                                                                                                                                                               | Lgmn          |
| 103330_at   | 1.60 | spermatid perinuclear RNA binding protein                                                                                                                              | Spnr          |
| 94362_at    | 1.60 | RIKEN cDNA 3010033P07 gene                                                                                                                                             | 3010033P07Rik |
| 102965_at   | 1.60 | Mus musculus 13 days embryo forelimb cDNA, RIKEN full-length enriched library, clone:5930414A15 product:hypothetical EF-hand containing protein, full insert sequence. |               |
| 93025_at    | 1.60 | Nedd4 family interacting protein 1                                                                                                                                     | Ndfip1        |
| 96079_at    | 1.60 | RIKEN cDNA 0610010K06 gene                                                                                                                                             | 0610010K06Rik |
| 103288_at   | 1.59 | nuclear receptor interacting protein 1                                                                                                                                 | Nrip1         |
| 160885_at   | 1.59 | RIKEN cDNA 2700010L10 gene                                                                                                                                             | 2700010L10Rik |
| 97105_at    | 1.59 | Mus musculus adult male hypothalamus cDNA, RIKEN full-length enriched library, clone:A230108E06 product:unknown EST, full insert sequence.                             |               |
| 93874_s_at  | 1.59 | interleukin 11 receptor, alpha chain 2                                                                                                                                 | Il11ra2       |
| 160126_at   | 1.59 | mitogen-activated protein kinase kinase 1 interacting protein 1                                                                                                        | Map2k1ip1     |
| 101023_f_at | 1.59 | RIKEN cDNA 0610010E21 gene                                                                                                                                             | 0610010E21Rik |
| 94073_at    | 1.58 | polymerase (RNA) II (DNA directed) polypeptide G                                                                                                                       | Polr2g        |
| 94340_at    | 1.58 | RIKEN cDNA 1110004L07 gene                                                                                                                                             | 1110004L07Rik |
| 96023_at    | 1.57 | cDNA sequence BC032215                                                                                                                                                 | BC032215      |
| 92241_at    | 1.57 | RIKEN cDNA 1500041O16 gene                                                                                                                                             | 1500041O16Rik |
| 99481_at    | 1.57 | expressed sequence AW060654                                                                                                                                            | AW060654      |
| 160227_s_at | 1.56 | bystin-like                                                                                                                                                            | Bysl          |
| 94817_at    | 1.56 | serine (or cysteine) proteinase inhibitor, clade H, member 1                                                                                                           | Serpinh1      |
| 94876_f_at  | 1.56 | golgi reassembly stacking protein 2                                                                                                                                    | Gorasp2       |
| 99127_at    | 1.56 | spinocerebellar ataxia 10 homolog (human)                                                                                                                              | Sca10         |
| 104015_at   | 1.55 | methionyl aminopeptidase 1                                                                                                                                             | Metap1        |
| 103350_at   | 1.55 | proteasome (prosome, macropain) 26S subunit, non-ATPase, 7                                                                                                             | Psmc7         |
| 99665_at    | 1.54 | special AT-rich sequence binding protein 1                                                                                                                             | Satb1         |
| 99953_at    | 1.54 | ral guanine nucleotide dissociation stimulator,-like 2                                                                                                                 | Rgl2          |
| 101104_at   | 1.54 | Down syndrome critical region gene 3                                                                                                                                   | Dscr3         |
| 97265_at    | 1.54 | RIKEN cDNA 1810013D10 gene                                                                                                                                             | 1810013D10Rik |

|             |      |                                                                                                                                                                                                  |               |
|-------------|------|--------------------------------------------------------------------------------------------------------------------------------------------------------------------------------------------------|---------------|
| 99025_at    | 1.54 | DEAD/H (Asp-Glu-Ala-Asp/His) box polypeptide 19                                                                                                                                                  | Ddx19         |
| 100089_at   | 1.54 | peptidylprolyl isomerase C                                                                                                                                                                       | Ppic          |
| 103090_at   | 1.54 | basic FGF repressed, Zic binding protein                                                                                                                                                         | Bfzb-pending  |
| 98875_at    | 1.54 | DNA segment, Chr 2, ERATO Doi 391, expressed                                                                                                                                                     | D2ErtD391e    |
| 94359_at    | 1.54 | expressed sequence AA960558                                                                                                                                                                      | AA960558      |
| 160866_at   | 1.53 | DNA fragmentation factor, alpha subunit                                                                                                                                                          | Dffa          |
| 98633_at    | 1.53 | RIKEN cDNA 1200015A22 gene                                                                                                                                                                       | 1200015A22Rik |
| 98912_at    | 1.53 | Mus musculus 2 days neonate thymus thymic cells cDNA, RIKEN full-length enriched library, clone:E430005I09 product:weakly similar to C-MPL BINDING PROTEIN [Homo sapiens], full insert sequence. |               |
| 101086_f_at | 1.53 | cellular nucleic acid binding protein                                                                                                                                                            | Cnbp          |
| 101973_at   | 1.52 | Cbp/p300-interacting transactivator, with Glu/Asp-rich carboxy-terminal domain, 2                                                                                                                | Cited2        |
| 93451_at    | 1.52 | ESTs                                                                                                                                                                                             |               |
| 98893_at    | 1.52 | RIKEN cDNA 2610016F04 gene                                                                                                                                                                       | 2610016F04Rik |
| 100877_at   | 1.52 | RIKEN cDNA 1810058I24 gene                                                                                                                                                                       | 1810058I24Rik |
| 94030_at    | 1.51 | DNA segment, Chr 3, ERATO Doi 176, expressed                                                                                                                                                     | D3ErtD176e    |
| 92554_at    | 1.51 | C-terminal binding protein 2                                                                                                                                                                     | Ctbp2         |
| 98111_at    | 1.51 | heat shock protein                                                                                                                                                                               | Hsp105        |
| 101516_at   | 1.51 | CD59a antigen                                                                                                                                                                                    | Cd59a         |
| 96245_at    | 1.51 | DNA segment, Chr 11, ERATO Doi 619, expressed                                                                                                                                                    | D11ErtD619e   |
| 92999_at    | 1.51 | sine oculis-related homeobox 4 homolog (Drosophila)                                                                                                                                              | Six4          |
| 94264_at    | 1.50 | v-raf-1 leukemia viral oncogene 1                                                                                                                                                                | Raf1          |
| 102302_at   | 1.50 | branched chain ketoacid dehydrogenase E1, beta polypeptide                                                                                                                                       | Bckdhb        |

**Significantly changed in NM GAS versus WT GAS**

| Affy ID#    | Fold Change | Gene Name                                                                                                                                                         | Gene Symbol |
|-------------|-------------|-------------------------------------------------------------------------------------------------------------------------------------------------------------------|-------------|
| 97786_at    | 2.73        | ankyrin repeat domain 2 (stretch responsive muscle)                                                                                                               | Ankrd2      |
| 103084_at   | 2.37        | cysteine-rich protein 3                                                                                                                                           | Csrp3       |
| 102213_at   | 2.05        | cardiac morphogenesis                                                                                                                                             | Xin         |
| 103699_i_at | 1.69        | Mus musculus 10 days neonate cerebellum cDNA, RIKEN full-length enriched library, clone:B930095M03 product:similar to FRAT2 [Homo sapiens], full insert sequence. |             |
| 93285_at    | 1.67        | dual specificity phosphatase 6                                                                                                                                    | Dusp6       |
| 97971_at    | 1.59        | 5phosphorylase kinase, gamma 2 (testis)                                                                                                                           | Phkg2       |
| 96802_at    | 1.58        | programmed cell death protein 7                                                                                                                                   | Pdcd7       |
| 96167_at    | 1.54        | Bcl2-associated athanogene 3                                                                                                                                      | Bag3        |

**Significantly changed in NM DIA versus WT DIA**

| Affy ID#    | Fold Change | Gene Name                                                                                                                                             | Gene Symbol   |
|-------------|-------------|-------------------------------------------------------------------------------------------------------------------------------------------------------|---------------|
| 97786_at    | 6.68        | ankyrin repeat domain 2 (stretch responsive muscle)                                                                                                   | Ankrd2        |
| 103084_at   | 3.96        | cysteine-rich protein 3                                                                                                                               | Csrp3         |
| 103526_at   | 3.14        | peptidyl arginine deiminase, type II                                                                                                                  | Padi2         |
| 160913_at   | 2.31        | nebulin-related anchoring protein                                                                                                                     | Nrap          |
| 102714_at   | 1.90        | heat shock protein 1-like                                                                                                                             | Hspa11        |
| 97395_at    | 1.81        | DNA segment, Chr 19, Wayne State University 55, expressed                                                                                             | D19Wsu55e     |
| 104098_at   | -1.50       | peroxisomal membrane protein 2, 22 kDa                                                                                                                | Pxmp2         |
| 162403_at   | -1.50       | RIKEN cDNA 0610013D04 gene                                                                                                                            | 0610013D04Rik |
| 98385_at    | -1.50       | protein tyrosine phosphatase, non-receptor type 14                                                                                                    | Ptpn14        |
| 102362_i_at | -1.50       | Jun-B oncogene                                                                                                                                        | Junb          |
| 93753_at    | -1.50       | LPS-induced TN factor                                                                                                                                 | Litaf         |
| 104492_at   | -1.50       | early B-cell factor 3                                                                                                                                 | Ebf3          |
| 160118_at   | -1.50       | matrix metalloproteinase 14 (membrane-inserted)                                                                                                       | Mmp14         |
| 97886_at    | -1.50       | sepiapterin reductase                                                                                                                                 | Spr           |
| 93965_r_at  | -1.50       | DEAD/H (Asp-Glu-Ala-Asp/His) box polypeptide 6                                                                                                        | Ddx6          |
| 98169_s_at  | -1.50       | frizzled homolog 3 (Drosophila)                                                                                                                       | Fzd3          |
| 161859_f_at | -1.50       | synuclein, gamma                                                                                                                                      | Sncg          |
| 100425_at   | -1.50       | spleen tyrosine kinase                                                                                                                                | Syk           |
| 104031_at   | -1.50       | patched homolog                                                                                                                                       | Ptch          |
| 95986_at    | -1.50       | ESTs, Weakly similar to PGBM_HUMAN Basement membrane-specific heparan sulfate proteoglycan core protein precursor (HSPG) (Perlecan) (PLC) [H.sapiens] |               |
| 96888_at    | -1.50       | aldo-keto reductase family 1, member A4 (aldehyde reductase)                                                                                          | Akr1a4        |
| 92540_f_at  | -1.50       | spermidine synthase                                                                                                                                   | Srm           |
| 99439_at    | -1.50       | MAS1 oncogene                                                                                                                                         | Mas1          |

|             |       |                                                                                                                                                                                            |               |
|-------------|-------|--------------------------------------------------------------------------------------------------------------------------------------------------------------------------------------------|---------------|
| 100448_at   | -1.51 | activin A receptor, type II-like 1                                                                                                                                                         | Acvr1l        |
| 97176_at    | -1.51 |                                                                                                                                                                                            |               |
| 104529_at   | -1.51 | calcium modulating ligand                                                                                                                                                                  | Cam1          |
| 103606_r_at | -1.51 | regulator of G-protein signaling 19                                                                                                                                                        | Rgs19         |
| 160633_at   | -1.51 | RNA and export factor binding protein 1                                                                                                                                                    | Refbp1        |
| 96001_at    | -1.51 | cDNA sequence BC024322                                                                                                                                                                     | BC024322      |
| 93680_at    | -1.51 | serine/threonine kinase 10                                                                                                                                                                 | Stk10         |
| 101165_at   | -1.51 |                                                                                                                                                                                            |               |
| 100397_at   | -1.51 | TYRO protein tyrosine kinase binding protein                                                                                                                                               | Tyrobp        |
| 98002_at    | -1.51 | interferon consensus sequence binding protein                                                                                                                                              | Icsbp         |
| 160963_at   | -1.51 | RIKEN cDNA 9630050M13 gene                                                                                                                                                                 | 9630050M13Rik |
| 92245_at    | -1.51 | Mus musculus 12 days embryo male wolffian duct includes surrounding region cDNA, RIKEN full-length enriched library, clone:6720481A07 product:nucleolar protein GU2, full insert sequence. |               |
| 97871_at    | -1.51 | ERO1-like ( <i>S. cerevisiae</i> )                                                                                                                                                         | Ero1l         |
| 95308_at    | -1.51 | adenylate cyclase 4                                                                                                                                                                        | Adcy4         |
| 93042_at    | -1.51 | benzodiazepine receptor, peripheral                                                                                                                                                        | Bzrp          |
| 94886_at    | -1.51 | calnexin                                                                                                                                                                                   | Canx          |
| 95745_g_at  | -1.51 |                                                                                                                                                                                            |               |
| 161432_f_at | -1.51 | squamous cell carcinoma antigen recognized by T-cells 3                                                                                                                                    | Sart3         |
| 102356_at   | -1.51 | RIKEN cDNA 0710008A13 gene                                                                                                                                                                 | 0710008A13Rik |
| 96318_at    | -1.51 | interleukin 25                                                                                                                                                                             | Il25          |
| 93799_at    | -1.51 | Mus musculus 3 days neonate thymus cDNA, RIKEN full-length enriched library, clone:A630082L06 product:unknown EST, full insert sequence.                                                   |               |
| 98938_at    | -1.51 | RIKEN cDNA 1500026D16 gene                                                                                                                                                                 | 1500026D16Rik |
| 101029_f_at | -1.51 | actin, alpha, cardiac                                                                                                                                                                      | Actc1         |
| 101486_at   | -1.51 | proteasome (prosome, macropain) subunit, beta type 10                                                                                                                                      | Psmb10        |
| 98984_f_at  | -1.51 | glycerol phosphate dehydrogenase 1, mitochondrial                                                                                                                                          | Gpd2          |
| 93342_at    | -1.51 | Mki67 (FHA domain) interacting nucleolar phosphoprotein                                                                                                                                    | Mki67ip       |
| 92223_at    | -1.51 | complement component 1, q subcomponent, gamma polypeptide                                                                                                                                  | C1qg          |
| 94788_f_at  | -1.51 | tubulin, beta 5                                                                                                                                                                            | Tubb5         |
| 103654_at   | -1.51 | nucleosome binding protein 1                                                                                                                                                               | Nsbp1         |
| 160746_at   | -1.51 | Rho-associated coiled-coil forming kinase 1                                                                                                                                                | Rock1         |
| 99662_at    | -1.51 | pericentrin 2                                                                                                                                                                              | Pcnt2         |
| 98950_at    | -1.51 | small GTPase, homolog ( <i>S. cerevisiae</i> )                                                                                                                                             | Gtr2          |
| 96884_at    | -1.51 | DNA segment, Chr 16, ERATO Doi 465, expressed                                                                                                                                              | D16Erd465e    |
| 92631_f_at  | -1.51 | calmodulin 3                                                                                                                                                                               | Calm3         |
| 94774_at    | -1.51 | interferon activated gene 202A                                                                                                                                                             | Ifi202a       |
| 160250_at   | -1.51 | RIKEN cDNA 1810029G24 gene                                                                                                                                                                 | 1810029G24Rik |
| 162501_at   | -1.51 | B-cell receptor-associated protein 37                                                                                                                                                      | Bcap37        |
| 160310_at   | -1.52 | DNA segment, Chr 19, Brigham & Women's Genetics 1357 expressed                                                                                                                             | D19Bwg1357e   |
| 99405_at    | -1.52 | immunoglobulin kappa chain variable 8 (V8)                                                                                                                                                 | Igk-V8        |
| 102887_at   | -1.52 | tumor necrosis factor receptor superfamily, member 11b (osteoprotegerin)                                                                                                                   | Tnfrsf11b     |
| 160399_r_at | -1.52 | H2A histone family, member Y                                                                                                                                                               | H2afy         |
| 160265_at   | -1.52 | hypothetical protein MGC36374                                                                                                                                                              | MGC36374      |
| 94766_at    | -1.52 | eukaryotic translation elongation factor 1 alpha 1                                                                                                                                         | Eef1a1        |
| 96156_at    | -1.52 | RIKEN cDNA 1110008H02 gene                                                                                                                                                                 | 1110008H02Rik |
| 96128_at    | -1.52 | PCTAIRE-motif protein kinase 3                                                                                                                                                             | Pctk3         |
| 161250_at   | -1.52 | importin 4a                                                                                                                                                                                | Imp4a-pending |
| 102866_at   | -1.52 | TEA domain family member 4                                                                                                                                                                 | Tead4         |
| 160502_at   | -1.52 | cellular repressor of E1A-stimulated genes                                                                                                                                                 | Creg          |
| 102642_at   | -1.52 | solute carrier family 11 (proton-coupled divalent metal ion transporters), member 2                                                                                                        | Slc11a2       |
| 93378_at    | -1.52 | homeo box C8                                                                                                                                                                               | Hoxc8         |
| 98931_at    | -1.52 | RIKEN cDNA 2610016K11 gene                                                                                                                                                                 | 2610016K11Rik |
| 94545_at    | -1.52 | reticulon 1                                                                                                                                                                                | Rtn1          |
| 103016_s_at | -1.52 | CD68 antigen                                                                                                                                                                               | Cd68          |
| 160803_at   | -1.52 | DNA segment, Human S2298E                                                                                                                                                                  | D0H8S2298E    |
| 99956_at    | -1.52 | kit oncogene                                                                                                                                                                               | Kit           |
| 101781_f_at | -1.52 |                                                                                                                                                                                            |               |
| 160211_at   | -1.52 | DNA segment, Chr 17, Wayne State University 94, expressed                                                                                                                                  | D17Wsu94e     |
| 93033_at    | -1.52 | ubiquitin-conjugating enzyme E2E 3, UBC4/5 homolog (yeast)                                                                                                                                 | Ube2e3        |
| 160749_at   | -1.52 | RIKEN cDNA 1500011H22 gene                                                                                                                                                                 | 1500011H22Rik |
| 104148_at   | -1.52 | expressed sequence AI785303                                                                                                                                                                | AI785303      |
| 102306_at   | -1.52 | heparan sulfate 2-O-sulfotransferase 1                                                                                                                                                     | Hs2st1        |

|             |       |                                                                                                             |                |
|-------------|-------|-------------------------------------------------------------------------------------------------------------|----------------|
| 94282_at    | -1.52 | N-acylsphingosine amidohydrolase 1                                                                          | Asah1          |
| 98104_at    | -1.52 | ATPase, H <sup>+</sup> transporting, V0 subunit B                                                           | Atp6v0b        |
| 97529_at    | -1.52 | annexin A8                                                                                                  | Anxa8          |
| 103707_at   | -1.52 | complement component 3a receptor 1                                                                          | C3ar1          |
| 162442_r_at | -1.52 | adaptor protein complex AP-2, mu1                                                                           | Ap2m1          |
| 104513_at   | -1.52 | RIKEN cDNA 2410004N09 gene                                                                                  | 2410004N09Rik  |
| 160302_at   | -1.52 | RIKEN cDNA 1200003C05 gene                                                                                  | 1200003C05Rik  |
| 94275_at    | -1.52 | uroporphyrinogen decarboxylase                                                                              | Urod           |
| 97017_f_at  | -1.52 | secreted acidic cysteine rich glycoprotein                                                                  | Sparc          |
| 92796_at    | -1.52 | alkaline phosphatase 2, liver                                                                               | Akp2           |
| 92597_s_at  | -1.52 | ATPase, H <sup>+</sup> transporting, V1 subunit B, isoform 2                                                | Atp6v1b2       |
| 104231_at   | -1.52 | similar to heterogeneous nuclear ribonucleoprotein H3, isoform a [Homo sapiens]                             | LOC216024      |
| 93298_at    | -1.52 | 3'-phosphoadenosine 5'-phosphosulfate synthase 1                                                            | Papss1         |
| 98500_at    | -1.52 | interleukin 1 receptor-like 1                                                                               | Il1rl1         |
| 96200_at    | -1.52 | RIKEN cDNA 2410018C03 gene                                                                                  | 2410018C03Rik  |
| 100828_at   | -1.53 | myosin light chain, alkali, cardiac atria                                                                   | Myla           |
| 102389_s_at | -1.53 | growth associated protein 43                                                                                | Gap43          |
| 100488_at   | -1.53 | acid beta glucosidase                                                                                       | Gba            |
| 94473_at    | -1.53 | RIKEN cDNA 1810010L20 gene                                                                                  | 1810010L20Rik  |
| 102643_at   | -1.53 | homeo box A2                                                                                                | Hoxa2          |
| 101300_at   | -1.53 |                                                                                                             |                |
| 103352_at   | -1.53 | dolichyl-phosphate (UDP-N-acetylglucosamine) acetylglucosaminophosphotransferase 1 (GlcNAc-1-P transferase) | Dpagt1         |
| 93073_at    | -1.53 | nuclear factor of activated T-cells, cytoplasmic 2                                                          | Nfatc2         |
| 103080_at   | -1.53 | SAM domain and HD domain, 1                                                                                 | Samhd1         |
| 96087_at    | -1.53 | mannoside acetylglucosaminyltransferase 1                                                                   | Mgat1          |
| 93980_at    | -1.53 | cDNA sequence BC019943                                                                                      | BC019943       |
| 160496_s_at | -1.53 | mini chromosome maintenance deficient (S. cerevisiae)                                                       | Mcmd           |
| 97164_at    | -1.53 | RIKEN cDNA 2610207P08 gene                                                                                  | 2610207P08Rik  |
| 103381_at   | -1.53 | RIKEN cDNA 1810024J13 gene                                                                                  | 1810024J13Rik  |
| 103619_at   | -1.53 | RIKEN cDNA 1810044O22 gene                                                                                  | 1810044O22Rik  |
| 98543_at    | -1.53 | cathepsin S                                                                                                 | Ctss           |
| 96781_at    | -1.53 | expressed sequence AL023001                                                                                 | AL023001       |
| 160532_at   | -1.53 | tropomyosin 1, alpha                                                                                        | Tpm1           |
| 102724_at   | -1.53 | rabaptin 5                                                                                                  | Rab5ep-pending |
| 93698_at    | -1.53 | SRY-box containing gene 13                                                                                  | Sox13          |
| 99039_g_at  | -1.53 | adenylosuccinate synthetase 2, non muscle                                                                   | Adss2          |
| 95555_at    | -1.53 | unc119 homolog (C. elegans)                                                                                 | Unc119h        |
| 162347_f_at | -1.53 | biglycan                                                                                                    | Bgn            |
| 96154_at    | -1.53 | renin binding protein                                                                                       | Renbp          |
| 100584_at   | -1.53 | annexin A4                                                                                                  | Anxa4          |
| 103971_at   | -1.54 | purinergic receptor P2X, ligand-gated ion channel, 1                                                        | P2rx1          |
| 161363_r_at | -1.54 | galactokinase 1                                                                                             | Galk1          |
| 92743_at    | -1.54 | sperm adhesion molecule                                                                                     | Spam           |
| 102767_at   | -1.54 | RIKEN cDNA 2010305F15 gene                                                                                  | 2010305F15Rik  |
| 98018_at    | -1.54 | protein C receptor, endothelial                                                                             | Procr          |
| 97921_at    | -1.54 | Mus musculus, clone IMAGE:3494258, mRNA, partial cds                                                        |                |
| 101905_at   | -1.54 | itchy                                                                                                       | Itch           |
| 160447_at   | -1.54 | hippocampus abundant gene transcript 1                                                                      | Hiat1          |
| 95165_at    | -1.54 | sema domain, transmembrane domain (TM), and cytoplasmic domain, (semaphorin) 6D                             | Sema6d         |
| 94757_at    | -1.54 | cystic fibrosis transmembrane conductance regulator homolog                                                 | Cfr            |
| 93604_f_at  | -1.54 | immunoglobulin superfamily, member 4                                                                        | Igsf4          |
| 94503_at    | -1.54 | cell line NK14 derived transforming oncogene                                                                | Mel            |
| 160194_at   | -1.54 | glutaryl-Coenzyme A dehydrogenase                                                                           | Gcdh           |
| 102054_at   | -1.54 | ankyrin repeat hooked to zinc finger motif                                                                  | Ankhnz         |
| 97488_at    | -1.54 | RIKEN cDNA 1200011O22 gene                                                                                  | 1200011O22Rik  |
| 93058_at    | -1.54 | eukaryotic translation initiation factor 1A                                                                 | Eif1a          |
| 100976_at   | -1.54 | protein tyrosine phosphatase, non-receptor type 9                                                           | Ptpn9          |
| 96333_g_at  | -1.54 | sorting nexin 2                                                                                             | Snx2           |
| 93443_at    | -1.54 | RIKEN cDNA 1110027O12 gene                                                                                  | 1110027O12Rik  |
| 100029_at   | -1.54 | peroxisomal biogenesis factor 14                                                                            | Pex14          |
| 104471_at   | -1.54 | histone deacetylase 6                                                                                       | Hdac6          |

|             |       |                                                                                                                                                                                |               |
|-------------|-------|--------------------------------------------------------------------------------------------------------------------------------------------------------------------------------|---------------|
| 103044_g_at | -1.54 | mature T-cell proliferation 1                                                                                                                                                  | Mtcp1         |
| 97995_at    | -1.54 | transcription factor 7, T-cell specific                                                                                                                                        | Tcf7          |
| 99343_at    | -1.54 | retinoblastoma binding protein 7                                                                                                                                               | Rbbp7         |
| 94047_at    | -1.54 | RIKEN cDNA 0610031J06 gene                                                                                                                                                     | 0610031J06Rik |
| 99575_at    | -1.54 | RIKEN cDNA 2700004G04 gene                                                                                                                                                     | 2700004G04Rik |
| 101073_at   | -1.54 | low density lipoprotein receptor-related protein 1                                                                                                                             | Lrp1          |
| 92782_at    | -1.54 | thymopoietin                                                                                                                                                                   | Tmpo          |
| 100718_at   | -1.54 | prothymosin alpha                                                                                                                                                              | Ptma          |
| 92303_at    | -1.54 | protein tyrosine phosphatase, receptor type, R                                                                                                                                 | Ptpr          |
| 100367_g_at | -1.54 | caspase 9                                                                                                                                                                      | Casp9         |
| 99655_at    | -1.54 | signal peptidase complex (18kD)                                                                                                                                                | Spc18-pending |
| 103648_at   | -1.55 | tumor-associated calcium signal transducer 2                                                                                                                                   | Tacstd2       |
| 99421_at    | -1.55 |                                                                                                                                                                                |               |
| 103218_at   | -1.55 | DNA segment, Chr X, human DXS253E                                                                                                                                              | DXHXS253E     |
| 98982_at    | -1.55 | thymopoietin                                                                                                                                                                   | Tmpo          |
| 104740_at   | -1.55 | DNA segment, Chr 1, ERATO Doi 251, expressed                                                                                                                                   | D1Erttd251e   |
| 101003_at   | -1.55 | splicing factor, arginine/serine-rich 3 (SRp20)                                                                                                                                | Sfrs3         |
| 96726_at    | -1.55 | hypothetical protein MGC37111                                                                                                                                                  | MGC37111      |
| 102201_s_at | -1.55 | presenilin 1                                                                                                                                                                   | Psen1         |
| 100068_at   | -1.55 | aldehyde dehydrogenase family 1, subfamily A1                                                                                                                                  | Aldh1a1       |
| 104701_at   | -1.55 | basic helix-loop-helix domain containing, class B2                                                                                                                             | Bhlhb2        |
| 100915_at   | -1.55 | myosin heavy chain IX                                                                                                                                                          | Myh9          |
| 104172_at   | -1.55 | folate receptor 2 (fetal)                                                                                                                                                      | Folr2         |
| 97004_at    | -1.55 | olfactory receptor 71                                                                                                                                                          | Olf71         |
| 100293_at   | -1.55 | ESTs, Highly similar to C59B_MOUSE CD59B glycoprotein precursor (Membrane attack complex inhibition factor) (MACIF) (MAC-inhibitory protein) (MAC-IP) (Protectin) [M.musculus] |               |
| 160263_r_at | -1.55 | Nedd4 family interacting protein 2                                                                                                                                             | Ndfip2        |
| 104439_at   | -1.55 | N-acetyltransferase 6                                                                                                                                                          | Nat6          |
| 99934_at    | -1.55 | poliovirus receptor-related 2                                                                                                                                                  | Pvrl2         |
| 96294_s_at  | -1.55 | RIKEN cDNA 2410015N17 gene                                                                                                                                                     | 2410015N17Rik |
| 100593_at   | -1.55 | troponin T2, cardiac                                                                                                                                                           | Tnnt2         |
| 161492_i_at | -1.55 | mannoside acetylglucosaminyltransferase 1                                                                                                                                      | Mgat1         |
| 160291_at   | -1.55 | SEC61, alpha subunit (S. cerevisiae)                                                                                                                                           | Sec61a        |
| 161535_at   | -1.55 | polycystic kidney disease 1 homolog                                                                                                                                            | Pkd1          |
| 93595_at    | -1.55 | ceroid-lipofuscinosis, neuronal 2                                                                                                                                              | Cln2          |
| 97248_at    | -1.55 | diazepam binding inhibitor                                                                                                                                                     | Dbi           |
| 160356_at   | -1.55 | RIKEN cDNA 0610011D08 gene                                                                                                                                                     | 0610011D08Rik |
| 93843_at    | -1.55 | DNA segment, Chr 14, ERATO Doi 484, expressed                                                                                                                                  | D14Erttd484e  |
| 98107_at    | -1.55 | coronin, actin binding protein 1C                                                                                                                                              | Coro1c        |
| 162417_at   | -1.55 | RIKEN cDNA 1500001M20 gene                                                                                                                                                     | 1500001M20Rik |
| 103338_at   | -1.55 | RIKEN cDNA C030013N01 gene                                                                                                                                                     | C030013N01Rik |
| 101014_at   | -1.55 | interferon (alpha and beta) receptor 2                                                                                                                                         | Ifnar2        |
| 162276_i_at | -1.56 | complement component 1, q subcomponent, beta polypeptide                                                                                                                       | C1qb          |
| 102223_at   | -1.56 | periplakin                                                                                                                                                                     | Ppl           |
| 103318_at   | -1.56 | GA repeat binding protein, beta 1                                                                                                                                              | Gabpb1        |
| 100289_at   | -1.56 | ephrin A3                                                                                                                                                                      | Efna3         |
| 101700_at   | -1.56 | per-hexamer repeat gene 4                                                                                                                                                      | Phxr4         |
| 104318_at   | -1.56 | peroxin 5                                                                                                                                                                      | Pex5          |
| 104624_at   | -1.56 | hypothetical protein MGC38812                                                                                                                                                  | MGC38812      |
| 100908_at   | -1.56 | protein tyrosine phosphatase, receptor type, A                                                                                                                                 | Ptpra         |
| 98438_f_at  | -1.56 | histocompatibility 2, Q region locus 7                                                                                                                                         | H2-Q7         |
| 160495_at   | -1.56 |                                                                                                                                                                                |               |
| 102813_f_at | -1.56 | RIKEN cDNA 5730525G14 gene                                                                                                                                                     | 5730525G14Rik |
| 97511_at    | -1.56 | monoglyceride lipase                                                                                                                                                           | Mgl1          |
| 93087_r_at  | -1.56 | ubiquitin specific protease 25                                                                                                                                                 | Usp25         |
| 96071_at    | -1.56 | ribosomal protein S25                                                                                                                                                          | Rps25         |
| 95883_at    | -1.56 | RIKEN cDNA D530048A03 gene                                                                                                                                                     | D530048A03Rik |
| 103359_at   | -1.56 | similar to hypothetical protein FLJ13984                                                                                                                                       | LOC228019     |
| 92394_f_at  | -1.56 | cAMP responsive element binding protein-like 1                                                                                                                                 | Creb11        |
| 103752_r_at | -1.56 | Mus musculus 13 days embryo male testis cDNA, RIKEN full-length enriched library, clone:6030431H11 product:unknown EST, full insert sequence.                                  |               |
| 100004_at   | -1.56 | RIKEN cDNA 5930412E23 gene                                                                                                                                                     | 5930412E23Rik |
| 93290_at    | -1.56 | purine-nucleoside phosphorylase                                                                                                                                                | Pnp           |
| 102193_at   | -1.56 | SA rat hypertension-associated homolog                                                                                                                                         | Sah           |

|             |       |                                                                                                                                              |                 |
|-------------|-------|----------------------------------------------------------------------------------------------------------------------------------------------|-----------------|
| 104380_at   | -1.56 | solute carrier family 35 (CMP-sialic acid transporter), member 1                                                                             | Slc35a1         |
| 97125_f_at  | -1.56 | histocompatibility 2, K region                                                                                                               | H2-K            |
| 103588_at   | -1.56 | a disintegrin and metalloproteinase domain 15 (metargidin)                                                                                   | Adam15          |
| 97273_at    | -1.56 | arsenate resistance protein 2                                                                                                                | Ars2-pending    |
| 161077_f_at | -1.56 | SWI/SNF related, matrix associated, actin dependent regulator of chromatin, subfamily d, member 2                                            | Smardc2         |
| 99671_at    | -1.57 | adipsin                                                                                                                                      | Adn             |
| 101681_f_at | -1.57 |                                                                                                                                              |                 |
| 160731_at   | -1.57 | RAB25, member RAS oncogene family                                                                                                            | Rab25           |
| 94301_at    | -1.57 | ATPase, H+ transporting, V0 subunit                                                                                                          | Atp6v0e         |
| 160270_at   | -1.57 | Mus musculus adult male aorta and vein cDNA, RIKEN full-length enriched library, clone:A530090101 product:unknown EST, full insert sequence. |                 |
| 95430_f_at  | -1.57 | DNA segment, Chr 9, Wayne State University 18, expressed                                                                                     | D9Wsu18e        |
| 94492_at    | -1.57 | destrin                                                                                                                                      | Dstn            |
| 102056_f_at | -1.57 | RIKEN cDNA 2610002J02 gene                                                                                                                   | 2610002J02Rik   |
| 98515_at    | -1.57 | general transcription factor II E, polypeptide 2 (beta subunit)                                                                              | Gtf2e2          |
| 96058_s_at  | -1.57 | aldehyde dehydrogenase 2, mitochondrial                                                                                                      | Aldh2           |
| 101058_at   | -1.57 | amylase 1, salivary                                                                                                                          | Amy1            |
| 96655_g_at  | -1.57 | RIKEN cDNA 8430408H12 gene                                                                                                                   | 8430408H12Rik   |
| 161891_r_at | -1.57 | argininosuccinate lyase                                                                                                                      | Asl             |
| 102271_at   | -1.57 | DNA segment, Chr 11, Brigham & Women's Genetics 0280e expressed                                                                              | D11Bwg0280e     |
| 160697_at   | -1.57 | expressed sequence C77080                                                                                                                    | C77080          |
| 161633_r_at | -1.57 | glutathione S-transferase, mu 1                                                                                                              | Gstm1           |
| 93835_at    | -1.57 | RIKEN cDNA 0610006A03 gene                                                                                                                   | 0610006A03Rik   |
| 93019_at    | -1.57 | H2A histone family, member X                                                                                                                 | H2afx           |
| 160563_at   | -1.57 | hypothetical protein MGC31450                                                                                                                | MGC31450        |
| 104060_at   | -1.58 | RIKEN cDNA 2700088M22 gene                                                                                                                   | 2700088M22Rik   |
| 95400_i_at  | -1.58 | helicase (DNA) B                                                                                                                             | Helb            |
| 94297_at    | -1.58 | FK506 binding protein 5                                                                                                                      | Fkbp5           |
| 103975_at   | -1.58 | protein related to DAN and cerberus                                                                                                          | Prdc-pending    |
| 160494_at   | -1.58 | endonuclease G                                                                                                                               | Endog           |
| 102910_at   | -1.58 | ATP-binding cassette, sub-family B (MDR/TAP), member 1A                                                                                      | Abcb1a          |
| 161576_f_at | -1.58 | FLN29 gene product                                                                                                                           | Fln29-pending   |
| 161563_r_at | -1.58 | complement component 1, r subcomponent                                                                                                       | C1r             |
| 99099_at    | -1.58 | signal transducer and activator of transcription 3                                                                                           | Stat3           |
| 103207_at   | -1.58 | polymerase (DNA directed), alpha 1                                                                                                           | Pola1           |
| 92210_at    | -1.58 | angiopoietin 2                                                                                                                               | Agpt2           |
| 97211_at    | -1.58 | RIKEN cDNA 3230401N03 gene                                                                                                                   | 3230401N03Rik   |
| 103584_at   | -1.58 | RIKEN cDNA 5830471E12 gene                                                                                                                   | 5830471E12Rik   |
| 94715_at    | -1.58 | cytochrome P450, 1a1, aromatic compound inducible                                                                                            | Cyp1a1          |
| 101921_at   | -1.58 | RAB4A, member RAS oncogene family                                                                                                            | Rab4a           |
| 96957_at    | -1.58 | calcium and integrin binding 1 (calmyrin)                                                                                                    | Cib1            |
| 97058_f_at  | -1.58 | RAB33B, member of RAS oncogene family                                                                                                        | Rab33b          |
| 103913_at   | -1.58 | SEC61, alpha subunit 2 (S. cerevisiae)                                                                                                       | Sec61a2-pending |
| 103247_at   | -1.58 | membrane protein, palmitoylated 3 (MAGUK p55 subfamily member 3)                                                                             | Mpp3            |
| 95765_at    | -1.58 | alcohol dehydrogenase 5 (class III), chi polypeptide                                                                                         | Adh5            |
| 93482_at    | -1.58 | RIKEN cDNA 9530072E15 gene                                                                                                                   | 9530072E15Rik   |
| 160074_at   | -1.58 | dopa decarboxylase                                                                                                                           | Ddc             |
| 102401_at   | -1.58 | interferon regulatory factor 1                                                                                                               | Irf1            |
| 160121_at   | -1.58 | RIKEN cDNA 2810017M24 gene                                                                                                                   | 2810017M24Rik   |
| 102217_at   | -1.58 | G protein-coupled receptor kinase 5                                                                                                          | Gprk5           |
| 96832_at    | -1.58 | M.musculus partial cochlear mRNA (clone 301A6)                                                                                               |                 |
| 92624_r_at  | -1.58 | loricrin                                                                                                                                     | Lor             |
| 102791_at   | -1.58 | proteasome (prosome, macropain) subunit, beta type 8 (large multifunctional protease 7)                                                      | Psmb8           |
| 92756_r_at  | -1.58 | secretin                                                                                                                                     | Sct             |
| 99597_at    | -1.58 | guanine nucleotide binding protein, alpha inhibiting 2                                                                                       | Gnai2           |
| 92831_at    | -1.58 | sideroflexin 1                                                                                                                               | Sfxn1           |
| 101207_at   | -1.59 | peptidylprolyl isomerase A                                                                                                                   | Ppia            |
| 103021_r_at | -1.59 | mitogen activated protein kinase kinase kinase 1                                                                                             | Map3k1          |
| 104620_at   | -1.59 | RIKEN cDNA 2010300G19 gene                                                                                                                   | 2010300G19Rik   |
| 95904_at    | -1.59 | RIKEN cDNA 6430543G08 gene                                                                                                                   | 6430543G08Rik   |
| 100407_at   | -1.59 | galanin                                                                                                                                      | Gal             |
| 93126_at    | -1.59 | creatine kinase, brain                                                                                                                       | Ckb             |

|             |       |                                                                                         |               |
|-------------|-------|-----------------------------------------------------------------------------------------|---------------|
| 97770_s_at  | -1.59 | DNA segment, Chr 6, Wayne State University 176, expressed                               | D6Wsu176e     |
| 100927_at   | -1.59 | phospholipid transfer protein                                                           | Pltp          |
| 92265_f_at  | -1.59 | Sjogren syndrome antigen A2                                                             | Ssa2          |
| 93011_at    | -1.59 | gamma-aminobutyric acid (GABA(A)) receptor-associated protein-like 1                    | Gabarap1      |
| 160392_at   | -1.59 | RIKEN cDNA B430110G05 gene                                                              | B430110G05Rik |
| 103815_at   | -1.59 | peroxisomal biogenesis factor 11b                                                       | Pex11b        |
| 160727_at   | -1.59 | RIKEN cDNA 2410002F23 gene                                                              | 2410002F23Rik |
| 97508_at    | -1.59 | malate dehydrogenase, soluble                                                           | Mor2          |
| 101448_at   | -1.59 | HGF-regulated tyrosine kinase substrate                                                 | Hgs           |
| 104155_f_at | -1.59 | activating transcription factor 3                                                       | Atf3          |
| 92582_at    | -1.59 | solute carrier family 1, member 7                                                       | Slc1a7        |
| 92225_f_at  | -1.59 | RNA polymerase 1-2 (128 kDa subunit)                                                    | Rpo1-2        |
| 101806_at   | -1.59 |                                                                                         |               |
| 160559_at   | -1.59 | proteasome (prosome, macropain) subunit, beta type 5                                    | Psmb5         |
| 94812_at    | -1.59 | general transcription factor II H, polypeptide 1                                        | Gtf2h1        |
| 103010_at   | -1.59 | RIKEN cDNA 6720476A01 gene                                                              | 6720476A01Rik |
| 104363_at   | -1.59 | ESTs, Moderately similar to CDSN_HUMAN Corneodesmosin precursor (S protein) [H.sapiens] |               |
| 162447_f_at | -1.59 | major vault protein                                                                     | Mvp           |
| 95782_at    | -1.59 |                                                                                         |               |
| 97166_at    | -1.60 | elaC homolog 2 (E. coli)                                                                | Elac2         |
| 93556_at    | -1.60 | keratin complex 2, basic, gene 10                                                       | Krt2-10       |
| 96812_at    | -1.60 | smoothened homolog (Drosophila)                                                         | Smo           |
| 161238_f_at | -1.60 | chaperonin subunit 3 (gamma)                                                            | Cct3          |
| 101763_at   | -1.60 | G-protein-coupled receptor 50                                                           | Gpr50         |
| 104277_at   | -1.60 | RIKEN cDNA 1300013N08 gene                                                              | 1300013N08Rik |
| 94382_at    | -1.60 | RIKEN cDNA 1110057K04 gene                                                              | 1110057K04Rik |
| 93094_at    | -1.60 | cerebellar degeneration-related 2                                                       | Cdr2          |
| 93324_at    | -1.60 | zinc finger protein 36, C3H type-like 1                                                 | Zfp361        |
| 102009_at   | -1.60 | RIKEN cDNA 6430511D02 gene                                                              | 6430511D02Rik |
| 92852_at    | -1.60 | fibronectin 1                                                                           | Fn1           |
| 97312_at    | -1.60 | CD164 antigen                                                                           | Cd164         |
| 160897_at   | -1.60 | RIKEN cDNA 2900035H07 gene                                                              | 2900035H07Rik |
| 96506_at    | -1.60 | anaplastic lymphoma kinase                                                              | Alk           |
| 101421_at   | -1.60 | ring finger protein 5                                                                   | Rnf5          |
| 104398_at   | -1.60 | RIKEN cDNA 1300010A20 gene                                                              | 1300010A20Rik |
| 103879_at   | -1.60 | hypothetical protein LOC235169                                                          | LOC235169     |
| 103790_at   | -1.60 | DNA segment, Chr 16, ERATO Doi 36, expressed                                            | D16ErtD36e    |
| 97473_at    | -1.61 | transmembrane 4 superfamily member 7                                                    | Tm4sf7        |
| 103669_at   | -1.61 | expressed sequence AA415275                                                             | AA415275      |
| 92637_at    | -1.61 | phosphofructokinase, liver, B-type                                                      | Pfkfb         |
| 101430_at   | -1.61 | SRY-box containing gene 4                                                               | Sox4          |
| 94825_at    | -1.61 | phospholipase A2, activating protein                                                    | Plaa          |
| 101498_at   | -1.61 | inositol (myo)-1(or 4)-monophosphatase 1                                                | Impa1         |
| 160925_at   | -1.61 | neuroblastoma ras oncogene                                                              | Nras          |
| 98152_at    | -1.61 | catenin src                                                                             | Catns         |
| 97906_at    | -1.61 | seven in absentia 2                                                                     | Siah2         |
| 100587_f_at | -1.61 | RIKEN cDNA 5730403B10 gene                                                              | 5730403B10Rik |
| 161127_i_at | -1.61 | ribosomal protein L24                                                                   | Rpl24         |
| 104538_at   | -1.61 | prostaglandin I2 (prostacyclin) synthase                                                | Ptgfs         |
| 94893_at    | -1.61 | RIKEN cDNA 2610301B20 gene                                                              | 2610301B20Rik |
| 104761_at   | -1.61 | RIKEN cDNA 2310046B19 gene                                                              | 2310046B19Rik |
| 96939_at    | -1.61 | myosin, light polypeptide 9, regulatory                                                 | Myf9          |
| 94245_at    | -1.61 | histocompatibility 47                                                                   | H47           |
| 96968_at    | -1.61 | limitin                                                                                 | Lmtn-pending  |
| 92611_at    | -1.61 | GPI-anchored membrane protein 1                                                         | Gpiap1        |
| 162402_r_at | -1.61 | homeo box A4                                                                            | Hoxa4         |
| 93697_at    | -1.61 | chromobox homolog 4 (Drosophila Pc class)                                               | Cbx4          |
| 93917_at    | -1.61 | tumor necrosis factor (ligand) superfamily, member 12                                   | Tnfsf12       |
| 160128_at   | -1.61 | propionyl Coenzyme A carboxylase, beta polypeptide                                      | Pccb          |
| 93465_at    | -1.61 | RIKEN cDNA 9130211I03 gene                                                              | 9130211I03Rik |
| 101876_s_at | -1.61 | histocompatibility 2, T region locus 17                                                 | H2-T17        |
| 162392_r_at | -1.62 | transgene insert site 737, insertional mutation, polycystic kidney disease              | TgN737Rpw     |
| 104141_at   | -1.62 | DNA segment, Chr 15, Wayne State University 75, expressed                               | D15Wsu75e     |
| 95670_at    | -1.62 | stathmin-like 2                                                                         | Stmn2         |



|             |       |                                                                                                                                                   |                |
|-------------|-------|---------------------------------------------------------------------------------------------------------------------------------------------------|----------------|
| 104578_f_at | -1.62 | actinin, alpha 1                                                                                                                                  | Actn1          |
| 160091_at   | -1.62 | phosphoglycerate mutase 1                                                                                                                         | Pgam1          |
| 98761_i_at  | -1.62 | zinc finger protein 97                                                                                                                            | Zfp97          |
| 101965_at   | -1.62 | ring finger protein 13                                                                                                                            | Rnf13          |
| 97327_at    | -1.62 | flap structure specific endonuclease 1                                                                                                            | Fen1           |
| 160848_at   | -1.62 | zinc fingers and homeoboxes protein 1                                                                                                             | Zhx1           |
| 98472_at    | -1.62 | histocompatibility 2, T region locus 23                                                                                                           | H2-T23         |
| 162470_at   | -1.62 | RIKEN cDNA 0610040H15 gene                                                                                                                        | 0610040H15Rik  |
| 101017_at   | -1.62 | cyclin-dependent kinase 4                                                                                                                         | Cdk4           |
| 104661_at   | -1.62 | Mus musculus 12 days embryo spinal ganglion cDNA, RIKEN full-length enriched library, clone:D130071L21 product:unknown EST, full insert sequence. |                |
| 101185_at   | -1.62 |                                                                                                                                                   |                |
| 103083_at   | -1.62 | lipase, hormone sensitive                                                                                                                         | Lipe           |
| 102028_at   | -1.62 | Ras association (RalGDS/AF-6) domain family 5                                                                                                     | Rassf5         |
| 100015_at   | -1.62 | Yamaguchi sarcoma viral (v-yes) oncogene homolog                                                                                                  | Yes            |
| 101618_r_at | -1.62 |                                                                                                                                                   |                |
| 100511_at   | -1.63 | RIKEN cDNA 6330406L22 gene                                                                                                                        | 6330406L22Rik  |
| 160964_at   | -1.63 | hypothetical protein MNCb-4137                                                                                                                    | MNCb-4137      |
| 96418_r_at  | -1.63 |                                                                                                                                                   |                |
| 104265_at   | -1.63 | kinase insert domain protein receptor                                                                                                             | Kdr            |
| 99029_at    | -1.63 | protein inhibitor of activated STAT 1                                                                                                             | Pias1          |
| 97727_at    | -1.63 | noggin                                                                                                                                            | Nog            |
| 100583_at   | -1.63 | immunoglobulin heavy chain, (J558 family)                                                                                                         | Igh-VJ558      |
| 101159_at   | -1.63 | microphthalmia-associated transcription factor                                                                                                    | Mitf           |
| 100112_at   | -1.63 | chemokine (C-X-C motif) ligand 12                                                                                                                 | Cxcl12         |
| 95885_at    | -1.63 | RIKEN cDNA 1200009F10 gene                                                                                                                        | 1200009F10Rik  |
| 93624_at    | -1.63 | RIKEN cDNA 8430417G17 gene                                                                                                                        | 8430417G17Rik  |
| 161392_f_at | -1.63 | leucine rich protein, B7 gene                                                                                                                     | Lrpb7          |
| 98151_s_at  | -1.63 | catenin src                                                                                                                                       | Catns          |
| 162420_r_at | -1.63 | heat shock protein                                                                                                                                | Hsp30-pending  |
| 160307_at   | -1.63 | phosphatidylinositol 4-kinase type 2 alpha                                                                                                        | Pi4k2a-pending |
| 160747_at   | -1.63 | regulator of G-protein signaling 3                                                                                                                | Rgs3           |
| 162104_f_at | -1.63 | TAP binding protein                                                                                                                               | Tapbp          |
| 102683_at   | -1.63 | solute carrier family 30 (zinc transporter), member 3                                                                                             | Slc30a3        |
| 102025_at   | -1.63 | chemokine (C-X-C motif) ligand 13                                                                                                                 | Cxcl13         |
| 162125_f_at | -1.63 | ubiquitin C                                                                                                                                       | Ubc            |
| 99081_at    | -1.63 | serine (or cysteine) proteinase inhibitor, clade G, member 1                                                                                      | Serping1       |
| 100682_f_at | -1.63 | immunoglobulin kappa chain variable 8 (V8)                                                                                                        | Igk-V8         |
| 162292_r_at | -1.63 | RIKEN cDNA 2510039O18 gene                                                                                                                        | 2510039O18Rik  |
| 103443_at   | -1.63 | absent in melanoma 1                                                                                                                              | Aim1           |
| 160967_at   | -1.63 | expressed sequence C79732                                                                                                                         | C79732         |
| 104257_g_at | -1.63 | pleckstrin homology, Sec7 and coiled/coil domains, binding protein                                                                                | Pscdbp         |
| 95523_at    | -1.63 | RIKEN cDNA 6530401D17 gene                                                                                                                        | 6530401D17Rik  |
| 102064_at   | -1.63 | caspase 1                                                                                                                                         | Casp1          |
| 97179_at    | -1.63 | ESTs, Moderately similar to putative c-Myc-responsive [Homo sapiens] [H.sapiens]                                                                  |                |
| 160988_r_at | -1.63 | DNA segment, Chr 3, ERATO Doi 330, expressed                                                                                                      | D3Ertd330e     |
| 94254_at    | -1.63 | chloride intracellular channel 4 (mitochondrial)                                                                                                  | Clic4          |
| 100987_f_at | -1.63 | RIKEN cDNA 1500019G21 gene                                                                                                                        | 1500019G21Rik  |
| 92968_at    | -1.63 | ADP-ribosylation factor 5                                                                                                                         | Arf5           |
| 94470_i_at  | -1.64 | solute carrier family 30 (zinc transporter), member 5                                                                                             | Slc30a5        |
| 100429_at   | -1.64 | protoporphyrinogen oxidase                                                                                                                        | Ppox           |
| 99109_at    | -1.64 | immediate early response 2                                                                                                                        | Ier2           |
| 101955_at   | -1.64 | heat shock 70kD protein 5 (glucose-regulated protein)                                                                                             | Hspa5          |
| 103809_r_at | -1.64 | dynein, cytoplasmic, intermediate chain 1                                                                                                         | Dncic1         |
| 100577_at   | -1.64 | small nuclear ribonucleoprotein D1                                                                                                                | Snrpd1         |
| 100717_at   | -1.64 | cDNA sequence U90926                                                                                                                              | U90926         |
| 98076_at    | -1.64 | endoplasmic reticulum protein 29                                                                                                                  | Erp29          |
| 102879_s_at | -1.64 | Fc receptor, IgG, high affinity I                                                                                                                 | Fcgr1          |
| 93778_at    | -1.64 | RIKEN cDNA 5830484A20 gene                                                                                                                        | 5830484A20Rik  |
| 96392_at    | -1.64 | ESTs                                                                                                                                              |                |
| 97304_at    | -1.64 | upstream binding protein 1                                                                                                                        | Ubp1           |
| 160568_at   | -1.64 | enolase 1, alpha non-neuron                                                                                                                       | Eno1           |

|                      |       |                                                                                                                                                      |               |
|----------------------|-------|------------------------------------------------------------------------------------------------------------------------------------------------------|---------------|
| 103428_at            | -1.64 | RIKEN cDNA 2410142G14 gene                                                                                                                           | 2410142G14Rik |
| 160429_at            | -1.64 | NTF2-related export protein 1                                                                                                                        | Nxt1          |
| 103488_at            | -1.64 | selectin, platelet (p-selectin) ligand                                                                                                               | Selp1         |
| 95575_r_at           | -1.64 | expressed sequence AA960172                                                                                                                          | AA960172      |
| 102233_at            | -1.64 | Mus musculus 12 days embryo spinal ganglion cDNA, RIKEN full-length enriched library, clone:D130005N12 product:unclassifiable, full insert sequence. |               |
| 101703_at            | -1.64 |                                                                                                                                                      |               |
| 92718_at             | -1.64 | RIKEN cDNA 2310061N23 gene                                                                                                                           | 2310061N23Rik |
| 93806_at             | -1.65 | SH3-binding domain glutamic acid-rich protein like                                                                                                   | Sh3bgrl       |
| 160193_at            | -1.65 | ORM1-like 2 ( <i>S. cerevisiae</i> )                                                                                                                 | Ormdl2        |
| 94056_at             | -1.65 | stearoyl-Coenzyme A desaturase 1                                                                                                                     | Scd1          |
| 101416_f_at          | -1.65 | HLA-B associated transcript 4                                                                                                                        | Bat4          |
| 104633_at            | -1.65 | disabled homolog 2 ( <i>Drosophila</i> )                                                                                                             | Dab2          |
| 161446_r_at          | -1.65 | protease, serine, 25                                                                                                                                 | Prss25        |
| 96135_at             | -1.65 | RIKEN cDNA 3110003A17 gene                                                                                                                           | 3110003A17Rik |
| 94821_at             | -1.65 | X-box binding protein 1                                                                                                                              | Xbp1          |
| 95989_at             | -1.65 | ESTs                                                                                                                                                 |               |
| 99645_at             | -1.65 | RIKEN cDNA 4921506J03 gene                                                                                                                           | 4921506J03Rik |
| 161756_at            | -1.65 | RIKEN cDNA 4833420N02 gene                                                                                                                           | 4833420N02Rik |
| 104184_at            | -1.65 | natriuretic peptide precursor type B                                                                                                                 | Nppb          |
| 101632_at            | -1.65 | tumor necrosis factor receptor superfamily, member 11a                                                                                               | Tnfrsf11a     |
| 160789_at            | -1.65 | RIKEN cDNA 9530090G24 gene                                                                                                                           | 9530090G24Rik |
| 93512_f_at           | -1.65 | expressed sequence AI987814                                                                                                                          | AI987814      |
| 95084_f_at           | -1.65 | glyoxylate reductase/hydroxypyruvate reductase                                                                                                       | Ghrpr         |
| 98988_at             | -1.65 | molecule possessing ankyrin-repeats induced by lipopolysaccharide                                                                                    | Mail-pending  |
| 100979_at            | -1.66 | Trif gene                                                                                                                                            | Trif-pending  |
| 99071_at             | -1.66 | macrophage expressed gene 1                                                                                                                          | Mpeg1         |
| 93914_at             | -1.66 | interleukin 1 receptor, type I                                                                                                                       | Il1r1         |
| 103579_at            | -1.66 | RAS-related C3 botulinum substrate 2                                                                                                                 | Rac2          |
| 94915_at             | -1.66 | peptidylprolyl isomerase B                                                                                                                           | Ppib          |
| 160499_at            | -1.66 | tumor rejection antigen gp96                                                                                                                         | Tra1          |
| AFFX-b-ActinMur/M124 | -1.66 | actin, beta, cytoplasmic                                                                                                                             | Actb          |
| 81_M_st              |       |                                                                                                                                                      |               |
| 100720_at            | -1.66 | poly A binding protein, cytoplasmic 1                                                                                                                | Pabpc1        |
| 160511_at            | -1.66 | chemokine (C-X-C motif) ligand 12                                                                                                                    | Cxcl12        |
| 99700_at             | -1.66 | tissue-type vomeronasal neurons putative pheromone receptor V2R1                                                                                     | LOC56552      |
| 102797_at            | -1.66 | retinal short-chain dehydrogenase/reductase 1                                                                                                        | Rsdrl-pending |
| 102781_at            | -1.66 | Paneth cell enhanced expression                                                                                                                      | Pcee-pending  |
| 162176_r_at          | -1.66 | glyceraldehyde-3-phosphate dehydrogenase                                                                                                             | Gapd          |
| 99523_at             | -1.66 | RIKEN cDNA 4432417N03 gene                                                                                                                           | 4432417N03Rik |
| 100702_at            | -1.66 | sex hormone binding globulin                                                                                                                         | Shbg          |
| 101603_g_at          | -1.66 | ESTs                                                                                                                                                 |               |
| 161983_f_at          | -1.66 | ribonuclease/angiogenin inhibitor 1                                                                                                                  | Rnh1          |
| 103673_at            | -1.66 | complement component 2 (within H-2S)                                                                                                                 | C2            |
| 95516_at             | -1.66 | RAB9, member RAS oncogene family                                                                                                                     | Rab9          |
| 101467_at            | -1.66 | S100 protein, beta polypeptide, neural                                                                                                               | S100b         |
| 160734_at            | -1.66 | adaptor-related protein complex AP-3, sigma 1 subunit                                                                                                | Ap3s1         |
| 95637_at             | -1.66 | expressed sequence AL024016                                                                                                                          | AL024016      |
| 94349_at             | -1.66 | ESTs                                                                                                                                                 |               |
| 98625_s_at           | -1.67 | alcohol dehydrogenase 5 (class III), chi polypeptide                                                                                                 | Adh5          |
| 102828_at            | -1.67 | mitogen activated protein kinase kinase 6                                                                                                            | Map2k6        |
| 101543_f_at          | -1.67 | tubulin, alpha 6                                                                                                                                     | Tuba6         |
| 94967_at             | -1.67 | hypothetical protein MGC28180                                                                                                                        | MGC28180      |
| 97359_at             | -1.67 | transmembrane 9 superfamily member 1                                                                                                                 | Tm9sf1        |
| 161109_at            | -1.67 | RIKEN cDNA 1110017P05 gene                                                                                                                           | 1110017P05Rik |
| 94132_at             | -1.67 | glutathione peroxidase 1                                                                                                                             | Gpx1          |
| 100037_at            | -1.67 | RIKEN cDNA 2310005B10 gene                                                                                                                           | 2310005B10Rik |
| 96569_at             | -1.67 | ESTs                                                                                                                                                 |               |
| 95063_at             | -1.67 | RIKEN cDNA 2310021G01 gene                                                                                                                           | 2310021G01Rik |
| 99847_at             | -1.67 | sialyltransferase 4A (beta-galactosidase alpha-2,3-sialyltransferase)                                                                                | Siat4a        |
| 99592_f_at           | -1.67 | retinol dehydrogenase 11                                                                                                                             | Rdh11         |
| 98277_at             | -1.67 | zinc finger protein, subfamily 1A, 4                                                                                                                 | Zfn1a4        |

|             |       |                                                                                                                |               |
|-------------|-------|----------------------------------------------------------------------------------------------------------------|---------------|
| 92711_at    | -1.67 | mast cell protease 6                                                                                           | Mcpt6         |
| 102101_f_at | -1.67 | expressed sequence BB129864                                                                                    | BB129864      |
| 92866_at    | -1.67 | histocompatibility 2, class II antigen A, alpha                                                                | H2-Aa         |
| 94273_at    | -1.67 | RIKEN cDNA 2610311119 gene                                                                                     | 2610311119Rik |
| 162313_f_at | -1.67 | UDP-N-acetyl-alpha-D-galactosamine:polypeptide N-acetylgalactosaminyltransferase 3                             | Galnt3        |
| 161500_i_at | -1.67 | Bcl-associated death promoter                                                                                  | Bad           |
| 92259_at    | -1.67 | RIKEN cDNA 9430070M15 gene                                                                                     | 9430070M15Rik |
| 95415_f_at  | -1.68 | complement component 1, r subcomponent                                                                         | C1r           |
| 95723_r_at  | -1.68 | RIKEN cDNA 2610009E16 gene                                                                                     | 2610009E16Rik |
| 160220_at   | -1.68 | zinc finger protein 110                                                                                        | Zfp110        |
| 102065_at   | -1.68 | ficolin A                                                                                                      | Fcna          |
| 93088_at    | -1.68 | beta-2 microglobulin                                                                                           | B2m           |
| 162311_f_at | -1.68 | ovarian cancer overexpressed 1                                                                                 | Ovcov1        |
| 93390_g_at  | -1.68 | prominin-like 1                                                                                                | Prom1         |
| 160465_at   | -1.68 | RIKEN cDNA 3300001H21 gene                                                                                     | 3300001H21Rik |
| 98589_at    | -1.68 | adipose differentiation related protein                                                                        | Adfp          |
| 95042_at    | -1.68 | RIKEN cDNA C030002N13 gene                                                                                     | C030002N13Rik |
| 98440_at    | -1.68 | RIKEN cDNA 2510002C21 gene                                                                                     | 2510002C21Rik |
| 160180_at   | -1.68 | calnexin                                                                                                       | Canx          |
| 95588_at    | -1.68 | alpha-methylacyl-CoA racemase                                                                                  | Amacr         |
| 100696_at   | -1.68 | phosphodiesterase 6A, cGMP-specific, rod, alpha                                                                | Pde6a         |
| 96002_at    | -1.69 | RIKEN cDNA 4921505F14 gene                                                                                     | 4921505F14Rik |
| 93993_at    | -1.69 | RIKEN cDNA 1300009F09 gene                                                                                     | 1300009F09Rik |
| 103047_at   | -1.69 | peroxisomal membrane protein 3, 35 kDa                                                                         | Pxmp3         |
| 104183_at   | -1.69 | DNA segment, Chr 2, ERATO Doi 435, expressed                                                                   | D2Ertd435e    |
| 92847_s_at  | -1.69 | mannose-6-phosphate receptor, cation dependent                                                                 | M6pr          |
| 104606_at   | -1.69 | CD52 antigen                                                                                                   | Cd52          |
| 93588_at    | -1.69 | gene trap locus 3                                                                                              | Gtl3          |
| 96057_at    | -1.69 | aldehyde dehydrogenase 2, mitochondrial                                                                        | Aldh2         |
| 104225_at   | -1.69 | ESTs                                                                                                           |               |
| 104091_at   | -1.69 | RIKEN cDNA 6720474K14 gene                                                                                     | 6720474K14Rik |
| 96277_at    | -1.69 | actin related protein 2/3 complex, subunit 5                                                                   | Arcp5         |
| 100596_at   | -1.69 | selenium binding protein 1                                                                                     | Selenbp1      |
| 103330_at   | -1.69 | spermatid perinuclear RNA binding protein                                                                      | Spnr          |
| 93749_at    | -1.69 | monoamine oxidase A                                                                                            | Maoa          |
| 103704_at   | -1.69 | ESTs, Weakly similar to RIKEN cDNA 5730493B19 [Mus musculus] [M.musculus]                                      |               |
| 93046_at    | -1.69 | RIKEN cDNA 1700030K07 gene                                                                                     | 1700030K07Rik |
| 100880_at   | -1.69 | ESTs, Weakly similar to lysophospholipase 1; phospholipase 1a; lysophospholipase 1 [Mus musculus] [M.musculus] |               |
| 93793_at    | -1.69 | LIM and SH3 protein 1                                                                                          | Lasp1         |
| 100775_at   | -1.69 | ESTs, Weakly similar to RIKEN cDNA 5730493B19 [Mus musculus] [M.musculus]                                      |               |
| 96591_at    | -1.69 | reelin                                                                                                         | Reln          |
| 103029_at   | -1.69 | programmed cell death 4                                                                                        | Pdcd4         |
| 101834_at   | -1.69 | mitogen activated protein kinase 3                                                                             | Mapk3         |
| 94095_at    | -1.70 | histocompatibility 2, Q region locus 1                                                                         | H2-Q1         |
| 102108_f_at | -1.70 | myosin heavy chain IX                                                                                          | Myh9          |
| 100328_s_at | -1.70 | paired-Ig-like receptor A3                                                                                     | Pira3         |
| 100885_at   | -1.70 | NIMA (never in mitosis gene a)-related expressed kinase 2                                                      | Nek2          |
| 102557_at   | -1.70 |                                                                                                                |               |
| 160632_at   | -1.70 | RIKEN cDNA 4930557O20 gene                                                                                     | 4930557O20Rik |
| 92315_at    | -1.70 | schlafen 4                                                                                                     | Slfn4         |
| 95686_at    | -1.70 | RAB14, member RAS oncogene family                                                                              | Rab14         |
| 103935_at   | -1.70 | ATPase, Ca <sup>++</sup> transporting, ubiquitous                                                              | Atp2a3        |
| 101922_at   | -1.70 | RIKEN cDNA 1110007A14 gene                                                                                     | 1110007A14Rik |
| 93583_s_at  | -1.70 |                                                                                                                |               |
| 93590_at    | -1.70 | RIKEN cDNA 1200015G06 gene                                                                                     | 1200015G06Rik |
| 101923_at   | -1.70 | phospholipase A2, group VII (platelet-activating factor acetylhydrolase, plasma)                               | Pla2g7        |
| 94427_at    | -1.70 | coatomer protein complex, subunit gamma 1                                                                      | Copg1         |
| 94725_f_at  | -1.71 | Mus musculus monoclonal antibody FB3 to cardiolipin, Ig light chain variable region mRNA, partial cds.         |               |
| 104417_at   | -1.71 | ESTs                                                                                                           |               |

|             |       |                                                                                                                                     |               |
|-------------|-------|-------------------------------------------------------------------------------------------------------------------------------------|---------------|
| 98405_at    | -1.71 | serine protease inhibitor 6                                                                                                         | Spi6          |
| 99992_at    | -1.71 | hypothetical protein LOC231291                                                                                                      | LOC231291     |
| 103685_at   | -1.71 | ESTs                                                                                                                                |               |
| 99015_at    | -1.71 | promyelocytic leukemia                                                                                                              | Pml           |
| 95387_f_at  | -1.71 | sema domain, immunoglobulin domain (Ig), transmembrane domain (TM) and short cytoplasmic domain, (semaphorin) 4B                    | Sema4b        |
| 103056_at   | -1.71 | RIKEN cDNA 6230425C22 gene                                                                                                          | 6230425C22Rik |
| 162428_i_at | -1.71 | S100 calcium binding protein A14                                                                                                    | S100a14       |
| 100616_at   | -1.71 | centromere autoantigen A                                                                                                            | Cenpa         |
| 97171_f_at  | -1.71 |                                                                                                                                     |               |
| 95383_at    | -1.71 | RIKEN cDNA 3110041O18 gene                                                                                                          | 3110041O18Rik |
| 102415_r_at | -1.72 | DnaJ (Hsp40) homolog, subfamily C, member 3                                                                                         | Dnajc3        |
| 99855_at    | -1.72 | mitogen activated protein kinase kinase kinase 5                                                                                    | Map3k5        |
| 93248_at    | -1.72 | RIKEN cDNA D730042P09 gene                                                                                                          | D730042P09Rik |
| 103723_at   | -1.72 | interleukin 13 receptor, alpha 1                                                                                                    | Il13ra1       |
| 160648_at   | -1.72 | fidgetin-like 1                                                                                                                     | Fignl1        |
| 160292_at   | -1.72 | DNA segment, Chr 15, ERATO Doi 785, expressed                                                                                       | D15ErtD785e   |
| 94537_at    | -1.72 | RIKEN cDNA 1500001M02 gene                                                                                                          | 1500001M02Rik |
| 102074_at   | -1.72 | orthopedia homolog, (Drosophila)                                                                                                    | Otp           |
| 92633_at    | -1.72 | cathepsin Z                                                                                                                         | Ctsz          |
| 94966_at    | -1.72 | glucose-6-phosphate dehydrogenase X-linked                                                                                          | G6pdx         |
| 96301_at    | -1.72 | ribosomal protein S27                                                                                                               | Rps27         |
| 161029_at   | -1.73 | RIKEN cDNA 6330416G13 gene                                                                                                          | 6330416G13Rik |
| 103229_at   | -1.73 | nuclear receptor coactivator 1                                                                                                      | Ncoa1         |
| 96761_at    | -1.73 | RIKEN cDNA 2210409B01 gene                                                                                                          | 2210409B01Rik |
| 97882_at    | -1.73 | SEC61, alpha subunit (S. cerevisiae)                                                                                                | Sec61a        |
| 161196_r_at | -1.73 | a disintegrin and metalloprotease domain 3 (cyritestin)                                                                             | Adam3         |
| 161348_r_at | -1.73 | PDZ and LIM domain 1 (elfin)                                                                                                        | Pdlim1        |
| 103260_at   | -1.73 | RIKEN cDNA 1110060D06 gene                                                                                                          | 1110060D06Rik |
| 101944_at   | -1.73 | lysophospholipase 1                                                                                                                 | Lypla1        |
| 101795_f_at | -1.73 |                                                                                                                                     |               |
| 103421_at   | -1.73 | stromal cell derived factor receptor 2                                                                                              | Sdfr2         |
| 92634_at    | -1.73 | dipeptidylpeptidase 4                                                                                                               | Dpp4          |
| 102366_at   | -1.73 | resistin                                                                                                                            | Retn          |
| 161655_at   | -1.73 | defender against cell death 1                                                                                                       | Dad1          |
| 160815_at   | -1.73 | expressed sequence C79673                                                                                                           | C79673        |
| 98922_at    | -1.73 | integral membrane protein 1                                                                                                         | Itn1          |
| 100415_at   | -1.74 |                                                                                                                                     |               |
| 95937_at    | -1.74 | ESTs                                                                                                                                |               |
| 96890_at    | -1.74 | RIKEN cDNA 1300002A08 gene                                                                                                          | 1300002A08Rik |
| 100469_at   | -1.74 | nuclear transcription factor-Y alpha                                                                                                | Nfya          |
| 94140_at    | -1.74 | macrophage scavenger receptor 1                                                                                                     | Msr1          |
| 93066_at    | -1.74 | granulin                                                                                                                            | Grn           |
| 92642_at    | -1.74 | carbonic anhydrase 2                                                                                                                | Car2          |
| 93391_at    | -1.74 | crystallin, gamma S                                                                                                                 | Crygs         |
| 160150_f_at | -1.74 | calponin 3, acidic                                                                                                                  | Cnn3          |
| 93337_at    | -1.74 | vacuolar protein sorting 4b (yeast)                                                                                                 | Vps4b         |
| 94877_at    | -1.74 | BTB (POZ) domain containing 1                                                                                                       | Btbd1         |
| 92280_at    | -1.74 | actinin, alpha 1                                                                                                                    | Actn1         |
| 92550_at    | -1.74 | keratin complex 1, acidic, gene 19                                                                                                  | Krt1-19       |
| 160853_at   | -1.74 | phosphatidylserine synthase 2                                                                                                       | Ptdss2        |
| 93861_f_at  | -1.74 |                                                                                                                                     |               |
| 97761_f_at  | -1.74 | killer cell lectin-like receptor, subfamily A, member 7                                                                             | Klra7         |
| 102102_at   | -1.74 | ESTs, Highly similar to POL2_MOUSE Retrovirus-related POL polyprotein [Contains: Reverse transcriptase ; Endonuclease] [M.musculus] |               |
| 94223_at    | -1.74 | neuroepithelial cell transforming gene 1                                                                                            | Net1          |
| 94548_at    | -1.74 | RIKEN cDNA 1200003O06 gene                                                                                                          | 1200003O06Rik |
| 102094_f_at | -1.74 | glutathione S-transferase, mu 1                                                                                                     | Gstm1         |
| 102130_f_at | -1.75 | EST                                                                                                                                 |               |
| 102414_i_at | -1.75 | DnaJ (Hsp40) homolog, subfamily C, member 3                                                                                         | Dnajc3        |
| 97581_at    | -1.75 | odd Oz/ten-m homolog 4 (Drosophila)                                                                                                 | Odz4          |
| 94920_at    | -1.75 | expressed sequence AI415282                                                                                                         | AI415282      |
| 97681_f_at  | -1.75 | glutathione S-transferase, mu 3                                                                                                     | Gstm3         |
| 93371_at    | -1.75 | basonuclin                                                                                                                          | Bnc           |
| 104353_at   | -1.75 | RIKEN cDNA 2500002G23 gene                                                                                                          | 2500002G23Rik |

|             |       |                                                                                 |                 |
|-------------|-------|---------------------------------------------------------------------------------|-----------------|
| 99513_at    | -1.75 | phospholipase A2, group IVA (cytosolic, calcium-dependent)                      | Pla2g4a         |
| 99119_at    | -1.75 | cofilin 1, non-muscle                                                           | Cfl1            |
| 161458_at   | -1.75 | ESTs                                                                            |                 |
| 162379_r_at | -1.75 | vimentin                                                                        | Vim             |
| 97516_at    | -1.75 | alpha glucosidase 2, alpha neutral subunit                                      | G2an            |
| 102876_at   | -1.75 | granzyme G                                                                      | Gzmg            |
| 101458_at   | -1.75 | wee 1 homolog (S. pombe)                                                        | Wee1            |
| 103697_at   | -1.75 | RIKEN cDNA A230075M04 gene                                                      | A230075M04Rik   |
| 160300_at   | -1.76 | trefoil factor 1                                                                | Tff1            |
| 97885_at    | -1.76 | RIKEN cDNA 1810009M01 gene                                                      | 1810009M01Rik   |
| 92698_at    | -1.76 | c-mer proto-oncogene tyrosine kinase                                            | Mertk           |
| 101595_at   | -1.76 | ESTs                                                                            |                 |
| 103537_at   | -1.76 | eukaryotic translation initiation factor 2 alpha kinase 3                       | Eif2ak3         |
| 96216_at    | -1.76 | RIKEN cDNA C730042F17 gene                                                      | C730042F17Rik   |
| 100333_at   | -1.76 | serum amyloid A 2                                                               | Saa2            |
| 161160_f_at | -1.76 | myeloblastosis oncogene-like 2                                                  | Mybl2           |
| 160678_at   | -1.76 | EST AI426782                                                                    | AI426782        |
| 103459_at   | -1.76 | endoplasmic reticulum membrane protein                                          | Ermelin-pending |
| 103690_at   | -1.77 | Williams-Beuren syndrome chromosome region 5 homolog (human)                    | Wbscr5          |
| 94549_at    | -1.77 | RIKEN cDNA 1200003O06 gene                                                      | 1200003O06Rik   |
| 93120_f_at  | -1.77 | histocompatibility 2, K region                                                  | H2-K            |
| 94709_at    | -1.77 | glial cells missing homolog 2 (Drosophila)                                      | Gcm2            |
| 93714_f_at  | -1.77 | histocompatibility 2, K region                                                  | H2-K            |
| 103733_at   | -1.77 | RIKEN cDNA 2900006A08 gene                                                      | 2900006A08Rik   |
| 100116_at   | -1.77 | RIKEN cDNA 2810417H13 gene                                                      | 2810417H13Rik   |
| 103826_at   | -1.77 | leukemia/lymphoma related factor                                                | Lrf             |
| 160637_at   | -1.77 | molybdenum cofactor synthesis 2                                                 | Mocs2           |
| 94352_at    | -1.77 | mbt domain containing 1                                                         | Mbd1            |
| 161682_f_at | -1.77 | GPI anchor attachment protein 1                                                 | Gpaa1           |
| 160658_at   | -1.77 | cyclin-dependent kinase 7 (homolog of Xenopus MO15 cdk-activating kinase)       | Cdk7            |
| 104554_at   | -1.77 | nuclear receptor subfamily 2, group F, member 6                                 | Nr2f6           |
| 96310_at    | -1.78 | myelin basic protein                                                            | Mbp             |
| 162358_i_at | -1.78 | solute carrier family 25 (mitochondrial carrier; citrate transporter), member 1 | Slc25a1         |
| 97281_at    | -1.78 | expressed sequence AA420407                                                     | AA420407        |
| 94791_s_at  | -1.78 | leukocyte tyrosine kinase                                                       | Ltk             |
| 94284_at    | -1.78 | diaphorase 1 (NADH)                                                             | Dia1            |
| 100404_at   | -1.78 | transgene insert site 737, insertional mutation, polycystic kidney disease      | TgN737Rpw       |
| 97405_at    | -1.78 | ribosomal protein S6 kinase polypeptide 1                                       | Rps6ka1         |
| 94515_at    | -1.78 | sulfide quinone reductase-like (yeast)                                          | Sqrdl           |
| 95469_at    | -1.78 | biotinidase                                                                     | Btd             |
| 94807_at    | -1.78 | solute carrier family 25 (mitochondrial carrier; citrate transporter), member 1 | Slc25a1         |
| 96491_at    | -1.78 | hypothetical protein B130031L15                                                 | B130031L15      |
| 92419_at    | -1.78 | chaperonin subunit 6b (zeta)                                                    | Cct6b           |
| 101718_f_at | -1.78 | immunoglobulin kappa chain variable 8 (V8)                                      | Igk-V8          |
| 160468_at   | -1.78 | myotrophin                                                                      | Mtpn            |
| 100005_at   | -1.78 | Tnf receptor associated factor 4                                                | Traf4           |
| 96975_at    | -1.78 |                                                                                 |                 |
| 103424_at   | -1.78 | RIKEN cDNA 6330442E10 gene                                                      | 6330442E10Rik   |
| 103816_at   | -1.79 | F11 receptor                                                                    | F11r            |
| 95505_at    | -1.79 | torsin family 1, member B                                                       | Tor1b           |
| 98846_f_at  | -1.79 | pregnancy specific glycoprotein 17                                              | Psg17           |
| 95609_at    | -1.79 | RIKEN cDNA 1810033K10 gene                                                      | 1810033K10Rik   |
| 160959_at   | -1.79 | RIKEN cDNA 5430409I18 gene                                                      | 5430409I18Rik   |
| 104494_at   | -1.79 | RIKEN cDNA 4921515A04 gene                                                      | 4921515A04Rik   |
| 104391_s_at | -1.79 | chloride channel 7                                                              | Clcn7           |
| 103226_at   | -1.79 | mannose receptor, C type 1                                                      | Mrc1            |
| 160628_at   | -1.79 | glycine C-acetyltransferase (2-amino-3-ketobutyrate-coenzyme A ligase)          | Gcat            |
| 96104_at    | -1.79 | RIKEN cDNA 3732413I11 gene                                                      | 3732413I11Rik   |
| 97541_f_at  | -1.79 | histocompatibility 2, D region locus 1                                          | H2-D1           |
| 98498_at    | -1.79 | caspase 7                                                                       | Casp7           |
| 161683_r_at | -1.79 | GTP binding protein 1                                                           | Gtpbp1          |
| 100499_at   | -1.79 | syntaxin 3                                                                      | Stx3            |
| 103706_at   | -1.79 | expressed sequence C79732                                                       | C79732          |
| 162201_r_at | -1.80 | RIKEN cDNA 1110007A14 gene                                                      | 1110007A14Rik   |

|             |       |                                                                                                                                        |               |
|-------------|-------|----------------------------------------------------------------------------------------------------------------------------------------|---------------|
| 100565_at   | -1.80 | glucosamine-6-phosphate deaminase                                                                                                      | Gnpi          |
| 104271_at   | -1.80 | adrenomedullin receptor                                                                                                                | Admr          |
| 99379_f_at  | -1.80 | histocompatibility 2, K region                                                                                                         | H2-K          |
| 98575_at    | -1.80 | fatty acid synthase                                                                                                                    | Fasn          |
| 99475_at    | -1.80 | suppressor of cytokine signaling 2                                                                                                     | Socs2         |
| 103863_at   | -1.80 | RIKEN cDNA 5630401J11 gene                                                                                                             | 5630401J11Rik |
| 99032_at    | -1.80 | RAS, dexamethasone-induced 1                                                                                                           | Rasd1         |
| 162168_r_at | -1.80 | 3-phosphoglycerate dehydrogenase                                                                                                       | Phgdh         |
| 100342_i_at | -1.80 | tubulin, alpha 1                                                                                                                       | Tuba1         |
| 102372_at   | -1.80 | immunoglobulin joining chain                                                                                                           | Igj           |
| 161796_r_at | -1.80 | potassium voltage-gated channel, subfamily Q, member 1                                                                                 | Kcnq1         |
| 101587_at   | -1.80 | epoxide hydrolase 1, microsomal                                                                                                        | Ephx1         |
| 97187_at    | -1.80 | Mus musculus 16 days embryo head cDNA, RIKEN full-length enriched library, clone:C130085H20 product:unknown EST, full insert sequence. |               |
| 161378_r_at | -1.80 | ESTs                                                                                                                                   |               |
| 101157_at   | -1.80 |                                                                                                                                        |               |
| 99034_at    | -1.81 | Iroquois related homeobox 3 (Drosophila)                                                                                               | Irx3          |
| 98535_at    | -1.81 | catechol-O-methyltransferase                                                                                                           | Comt          |
| 98140_at    | -1.81 | cadherin 1                                                                                                                             | Cdh1          |
| 96971_f_at  | -1.81 |                                                                                                                                        |               |
| 161887_r_at | -1.81 | RIKEN cDNA 4833412C19 gene                                                                                                             | 4833412C19Rik |
| 160221_at   | -1.81 | lectin, galactose-binding, soluble 2                                                                                                   | Lgals2        |
| 93090_at    | -1.81 | fibroblast growth factor receptor 2                                                                                                    | Fgfr2         |
| 95305_at    | -1.81 | RIKEN cDNA A630098A13 gene                                                                                                             | A630098A13Rik |
| 101991_at   | -1.81 | flavin containing monooxygenase 1                                                                                                      | Fmo1          |
| 161765_f_at | -1.81 | regulator of G-protein signalling 10                                                                                                   | Rgs10         |
| 94258_at    | -1.81 | Rho, GDP dissociation inhibitor (GDI) beta                                                                                             | Arhgdib       |
| 96668_at    | -1.81 | translocator of inner mitochondrial membrane 17 kDa, b                                                                                 | Timm17b       |
| 92586_at    | -1.81 | glutamate dehydrogenase                                                                                                                | Glud          |
| 94928_at    | -1.81 | tumor necrosis factor receptor superfamily, member 1b                                                                                  | Tnfrsf1b      |
| 161931_r_at | -1.81 | antigen identified by monoclonal antibody Ki 67                                                                                        | Mki67         |
| 104314_r_at | -1.81 | RIKEN cDNA 1110032A03 gene                                                                                                             | 1110032A03Rik |
| 99528_at    | -1.82 | spindlin                                                                                                                               | Spin          |
| 101966_s_at | -1.82 | ring finger protein 13                                                                                                                 | Rnf13         |
| 94829_at    | -1.82 | RIKEN cDNA 1110020A09 gene                                                                                                             | 1110020A09Rik |
| 97155_at    | -1.82 | growth differentiation factor 8                                                                                                        | Gdf8          |
| 93041_at    | -1.82 | mini chromosome maintenance deficient 4 homolog (S. cerevisiae)                                                                        | Mcmd4         |
| 100344_at   | -1.82 | hypothetical protein LOC226527                                                                                                         | LOC226527     |
| 97863_at    | -1.82 | DNA segment, Chr 8, ERATO Doi 354, expressed                                                                                           | D8ErtD354e    |
| 100564_at   | -1.82 | D-dopachrome tautomerase                                                                                                               | Ddt           |
| 92667_at    | -1.82 | androgen receptor                                                                                                                      | Ar            |
| 96560_at    | -1.83 | Mus musculus, Similar to hypothetical protein FLJ22789, clone IMAGE:5042703, mRNA                                                      |               |
| 102915_at   | -1.83 | coagulation factor II (thrombin) receptor-like 1                                                                                       | F2r1          |
| 162143_f_at | -1.83 | protein-kinase, interferon-inducible double stranded RNA dependent inhibitor, repressor of (P58 repressor)                             | Prkrr         |
| 95964_at    | -1.83 | RIKEN cDNA A430103N23 gene                                                                                                             | A430103N23Rik |
| 96117_r_at  | -1.83 | histocompatibility 13                                                                                                                  | H13           |
| 104173_at   | -1.83 | membrane-spanning 4-domains, subfamily A, member 1                                                                                     | Ms4a1         |
| 94408_at    | -1.83 | Ngfi-A binding protein 1                                                                                                               | Nab1          |
| 95631_at    | -1.83 | protein phosphatase 4, catalytic subunit                                                                                               | Ppp4c         |
| 98630_at    | -1.83 | NAD(P) dependent steroid dehydrogenase-like                                                                                            | Nsdhl         |
| 103240_f_at | -1.83 | eosinophil-associated ribonuclease 2                                                                                                   | Ear2          |
| 103349_at   | -1.84 | Yamaguchi sarcoma viral (v-yes-1) oncogene homolog                                                                                     | Lyn           |
| 94057_g_at  | -1.84 | stearoyl-Coenzyme A desaturase 1                                                                                                       | Scd1          |
| 95708_at    | -1.84 | DNA segment, Chr 3, University of California at Los Angeles 1                                                                          | D3Ucla1       |
| 160773_at   | -1.84 | DNA segment, Chr 4, Wayne State University 132, expressed                                                                              | D4Wsu132e     |
| 103581_at   | -1.84 | cytosolic acyl-CoA thioesterase 1                                                                                                      | Cte1          |
| 93085_at    | -1.84 | proteasome (prosome, macropain) subunit, beta type 9 (large multifunctional protease 2)                                                | Psmb9         |
| 161433_f_at | -1.84 | phosphatidylinositol glycan, class A                                                                                                   | Piga          |
| 97566_f_at  | -1.84 | immunoglobulin kappa chain variable 8 (V8)                                                                                             | Igk-V8        |
| 95645_at    | -1.84 | RIKEN cDNA 2310020H20 gene                                                                                                             | 2310020H20Rik |
| 162328_f_at | -1.84 | keratin complex 2, basic, gene 16                                                                                                      | Krt2-16       |

|             |       |                                                           |                  |
|-------------|-------|-----------------------------------------------------------|------------------|
| 95020_at    | -1.85 | RIKEN cDNA 9130415E20 gene                                | 9130415E20Rik    |
| 160638_at   | -1.85 | cyclin-dependent kinase inhibitor 2C (p18, inhibits CDK4) | Cdkn2c           |
| 93575_at    | -1.85 | gamma-glutamyl hydrolase                                  | Ggh              |
| 95322_g_at  | -1.85 | 5 hydroxytryptamine (serotonin) receptor 4                | Htr4             |
| 161997_f_at | -1.86 | aldehyde dehydrogenase 2, mitochondrial                   | Aldh2            |
| 100041_at   | -1.86 | RIKEN cDNA 3010027G13 gene                                | 3010027G13Rik    |
| 161016_at   | -1.86 | ESTs                                                      |                  |
| 98439_at    | -1.86 | RIKEN cDNA 2610318I15 gene                                | 2610318I15Rik    |
| 102957_at   | -1.86 | lymphocyte cytosolic protein 2                            | Lcp2             |
| 93774_at    | -1.86 | RIKEN cDNA 2610524G07 gene                                | 2610524G07Rik    |
| 92529_s_at  | -1.86 | aryl hydrocarbon receptor nuclear translocator            | Arnt             |
| 161002_at   | -1.86 | RIKEN cDNA C230088J01 gene                                | C230088J01Rik    |
| 102083_at   | -1.86 | Ras-like without CAAX 2                                   | Rit2             |
| 161881_f_at | -1.87 | zinc finger protein 259                                   | Zfp259           |
| 97682_r_at  | -1.87 | glutathione S-transferase, mu 3                           | Gstm3            |
| 98114_at    | -1.87 | Niemann Pick type C1                                      | Npc1             |
| 100749_at   | -1.87 | RIKEN cDNA D430004I08 gene                                | D430004I08Rik    |
| 160135_at   | -1.87 | DNA segment, Chr 16, ERATO Doi 502, expressed             | D16ErtD502e      |
| 161294_f_at | -1.87 | clusterin                                                 | Clu              |
| 97835_at    | -1.87 | RIKEN cDNA 0610007L05 gene                                | 0610007L05Rik    |
| 99546_at    | -1.87 | FK506 binding protein 2                                   | Fkbp2            |
| 103739_at   | -1.87 | RIKEN cDNA 1110017N23 gene                                | 1110017N23Rik    |
| 161092_at   | -1.87 | uridine monophosphate synthetase                          | Umps             |
| 161257_r_at | -1.87 | sorting nexin 17                                          | Snx17            |
| 100980_at   | -1.87 | Rho-associated coiled-coil forming kinase 1               | Rock1            |
| 94276_at    | -1.88 | hydroxysteroid (17-beta) dehydrogenase 12                 | Hsd17b12         |
| 161596_f_at | -1.88 | A kinase (PRKA) anchor protein 8                          | Akap8            |
| 93264_at    | -1.88 | sterol regulatory element binding factor 1                | Sreb1            |
| 160100_at   | -1.88 | DNA segment, Chr 4, Wayne State University 27, expressed  | D4Wsu27e         |
| 101938_at   | -1.88 | poly A binding protein, cytoplasmic 2                     | Pabpc2           |
| 103958_g_at | -1.88 | transferrin receptor                                      | Trfr             |
| 101082_at   | -1.88 | malic enzyme, supernatant                                 | Mod1             |
| 96972_f_at  | -1.89 | immunoglobulin kappa chain variable 8 (V8)                | Igk-V8           |
| 160548_at   | -1.89 | thioredoxin interacting protein                           | Txnip            |
| 162490_f_at | -1.89 | programmed cell death 6                                   | Pdcd6            |
| 103933_at   | -1.89 | yolk sac gene 2                                           | Ysg2             |
| 161421_r_at | -1.89 | expressed sequence AI504353                               | AI504353         |
| 160253_at   | -1.89 | fragilis                                                  | Fragilis-pending |
| 162500_f_at | -1.89 | tissue specific transplantation antigen P35B              | Tstap35b         |
| 95734_at    | -1.89 | mitochondrial ribosomal protein L3                        | Mrlp3            |
| 96151_at    | -1.89 | RIKEN cDNA 1110018O12 gene                                | 1110018O12Rik    |
| 104618_at   | -1.89 | retinoblastoma binding protein 9                          | Rbbp9            |
| 102156_f_at | -1.89 |                                                           |                  |
| 97261_at    | -1.89 | DnaJ (Hsp40) homolog, subfamily A, member 1               | Dnaja1           |
| 96759_r_at  | -1.89 | SEC14-like 2 (S. cerevisiae)                              | Sec14l2          |
| 162031_f_at | -1.89 | RIKEN cDNA A530057M15 gene                                | A530057M15Rik    |
| 102228_at   | -1.90 | linker for activation of T cells                          | Lat              |
| 95706_at    | -1.90 | lectin, galactose binding, soluble 3                      | Lgals3           |
| 103223_at   | -1.90 | RIKEN cDNA 5830406C15 gene                                | 5830406C15Rik    |
| 160512_at   | -1.90 | hypothetical protein MGC28978                             | MGC28978         |
| 97224_at    | -1.90 | RIKEN cDNA 5730463C12 gene                                | 5730463C12Rik    |
| 98149_s_at  | -1.90 | RIKEN cDNA 1110033J19 gene                                | 1110033J19Rik    |
| 104000_at   | -1.90 | RIKEN cDNA 2210023G05 gene                                | 2210023G05Rik    |
| 97430_at    | -1.90 | glucose-6-phosphatase, transport protein 1                | G6pt1            |
| 95286_at    | -1.90 | clusterin                                                 | Clu              |
| 100322_at   | -1.90 | immunoglobulin heavy chain 4 (serum IgG1)                 | Igh-4            |
| 95893_at    | -1.90 | B lymphoid kinase                                         | Blk              |
| 101441_i_at | -1.90 | inositol 1,4,5-triphosphate receptor 5                    | Itpr5            |
| 104381_at   | -1.91 | nuclear receptor subfamily 1, group H, member 3           | Nr1h3            |
| 98767_at    | -1.91 | YY1 transcription factor                                  | Yy1              |
| 92915_s_at  | -1.91 | homeo box B8                                              | Hoxb8            |
| 92688_at    | -1.91 | acid phosphatase 2, lysosomal                             | Acp2             |
| 162206_f_at | -1.91 | suppressor of cytokine signaling 3                        | Socs3            |
| 104407_at   | -1.91 | activated leukocyte cell adhesion molecule                | Alcam            |
| 160579_at   | -1.91 | mannosidase 1, alpha                                      | Man1a            |

|             |       |                                                                                                                                                                                                   |               |
|-------------|-------|---------------------------------------------------------------------------------------------------------------------------------------------------------------------------------------------------|---------------|
| 98485_at    | -1.91 | DNA segment, Chr 7, ERATO Doi 784, expressed                                                                                                                                                      | D7Erd784e     |
| 160846_at   | -1.91 | NIMA (never in mitosis gene a)-related expressed kinase 6                                                                                                                                         | Nek6          |
| 97203_at    | -1.92 | MARCKS-like protein                                                                                                                                                                               | Mlp           |
| 97870_s_at  | -1.92 | ERO1-like (S. cerevisiae)                                                                                                                                                                         | Ero1l         |
| 101061_at   | -1.92 | signal sequence receptor, beta                                                                                                                                                                    | Ssr2          |
| 102114_f_at | -1.92 | angiotensin-like 4                                                                                                                                                                                | Angptl4       |
| 101778_at   | -1.92 | gap junction membrane channel protein alpha 5                                                                                                                                                     | Gja5          |
| 93548_at    | -1.92 | RIKEN cDNA 1190006C12 gene                                                                                                                                                                        | 1190006C12Rik |
| 96020_at    | -1.92 | complement component 1, q subcomponent, beta polypeptide                                                                                                                                          | C1qb          |
| 93940_at    | -1.92 | paraoxonase 3                                                                                                                                                                                     | Pon3          |
| 102721_at   | -1.93 | immunoglobulin heavy chain 4 (serum IgG1)                                                                                                                                                         | Igh-4         |
| 96272_at    | -1.93 | Mus musculus, clone IMAGE:4161424, mRNA                                                                                                                                                           |               |
| 95417_at    | -1.93 | hypothetical protein MGC37173                                                                                                                                                                     | MGC37173      |
| 100095_at   | -1.93 | scavenger receptor class B, member 1                                                                                                                                                              | Scarb1        |
| 93039_at    | -1.93 | plasma glutamate carboxypeptidase                                                                                                                                                                 | Pgcp-pending  |
| 98320_at    | -1.93 | cytochrome P450, 26, retinoic acid A1                                                                                                                                                             | Cyp26a1       |
| 104579_r_at | -1.93 | actinin, alpha 1                                                                                                                                                                                  | Actn1         |
| 161055_r_at | -1.93 | RIKEN cDNA 6330409N04 gene                                                                                                                                                                        | 6330409N04Rik |
| 94952_at    | -1.93 | RIKEN cDNA C330012H03 gene                                                                                                                                                                        | C330012H03Rik |
| 101877_at   | -1.94 | solute carrier family 31, member 1                                                                                                                                                                | Slc31a1       |
| 103033_at   | -1.94 | complement component 4 (within H-2S)                                                                                                                                                              | C4            |
| 98092_at    | -1.94 | placenta-specific 8                                                                                                                                                                               | Plac8         |
| 160768_at   | -1.94 | Mus musculus 9 days embryo whole body cDNA, RIKEN full-length enriched library, clone:D030056L22 product:hypothetical Actinin-type actin-binding domain containing protein, full insert sequence. |               |
| 92914_at    | -1.94 |                                                                                                                                                                                                   |               |
| 97442_at    | -1.94 | RIKEN cDNA 4933419D20 gene                                                                                                                                                                        | 4933419D20Rik |
| 102737_at   | -1.94 | endothelin 1                                                                                                                                                                                      | Edn1          |
| 96700_r_at  | -1.95 | hypothetical protein LOC215449                                                                                                                                                                    | LOC215449     |
| 96119_s_at  | -1.95 | angiotensin-like 4                                                                                                                                                                                | Angptl4       |
| 97521_at    | -1.95 | argininosuccinate synthetase 1                                                                                                                                                                    | Ass1          |
| 102370_at   | -1.95 | hydroxysteroid (17-beta) dehydrogenase 11                                                                                                                                                         | Hsd17b11      |
| 93497_at    | -1.95 | complement component 3                                                                                                                                                                            | C3            |
| 94076_i_at  | -1.95 | ribophorin II                                                                                                                                                                                     | Rpn2          |
| 97222_at    | -1.95 | RAB6, member RAS oncogene family                                                                                                                                                                  | Rab6          |
| 97944_f_at  | -1.95 | T-cell receptor alpha, joining region                                                                                                                                                             | Tcra-J        |
| 160769_at   | -1.95 | carcinoma related gene                                                                                                                                                                            | Flana-pending |
| 161111_f_at | -1.95 | desert hedgehog                                                                                                                                                                                   | Dhh           |
| 96295_at    | -1.96 | phosphoserine aminotransferase                                                                                                                                                                    | Psat-pending  |
| 101886_f_at | -1.96 | histocompatibility 2, D region locus 1                                                                                                                                                            | H2-D1         |
| 103529_at   | -1.96 | RIKEN cDNA 2600017J23 gene                                                                                                                                                                        | 2600017J23Rik |
| 160479_at   | -1.96 | catalase                                                                                                                                                                                          | Cat           |
| 96132_at    | -1.96 | ethanol induced gene product EIG180                                                                                                                                                               | EIG180        |
| 99367_at    | -1.96 | RIKEN cDNA 5530600P05 gene                                                                                                                                                                        | 5530600P05Rik |
| 95026_at    | -1.96 | RIKEN cDNA 0610039N19 gene                                                                                                                                                                        | 0610039N19Rik |
| 96790_f_at  | -1.96 | RIKEN cDNA A530057M15 gene                                                                                                                                                                        | A530057M15Rik |
| 99991_at    | -1.97 | interleukin 17 receptor                                                                                                                                                                           | Il17r         |
| 93439_f_at  | -1.97 | PRKC, apoptosis, WT1, regulator                                                                                                                                                                   | Pawr          |
| 160580_at   | -1.97 | mannosidase 1, alpha                                                                                                                                                                              | Man1a         |
| 99142_at    | -1.97 | RIKEN cDNA 2310021M12 gene                                                                                                                                                                        | 2310021M12Rik |
| 97540_f_at  | -1.97 | histocompatibility 2, D region locus 1                                                                                                                                                            | H2-D1         |
| 104374_at   | -1.97 | serine (or cysteine) proteinase inhibitor, clade A, member 3N                                                                                                                                     | Serpina3n     |
| 100538_at   | -1.97 | superoxide dismutase 1, soluble                                                                                                                                                                   | Sod1          |
| 161644_f_at | -1.98 | guanidinoacetate methyltransferase                                                                                                                                                                | Gamt          |
| 103302_r_at | -1.98 | SRY-box containing gene 3                                                                                                                                                                         | Sox3          |
| 104719_at   | -1.98 | solute carrier family 12, member 7                                                                                                                                                                | Slc12a7       |
| 103708_at   | -1.98 | eukaryotic translation initiation factor 1A                                                                                                                                                       | Eif1a         |
| 93121_at    | -1.98 | ribosomal protein S24                                                                                                                                                                             | Rps24         |
| 100475_at   | -1.98 | tripartite motif protein 25                                                                                                                                                                       | Trim25        |
| 160101_at   | -1.98 | heme oxygenase (decycling) 1                                                                                                                                                                      | Hmox1         |
| 96605_at    | -1.99 | RIKEN cDNA 0610011I04 gene                                                                                                                                                                        | 0610011I04Rik |
| 103590_at   | -1.99 | gamma-glutamyl carboxylase                                                                                                                                                                        | Ggcx          |
| 92269_r_at  | -1.99 | ESTs                                                                                                                                                                                              |               |
| 160597_at   | -1.99 | DNA segment, Chr 1, ERATO Doi 622, expressed                                                                                                                                                      | D1Erd622e     |
| 95733_at    | -1.99 | solute carrier family 29 (nucleoside transporters), member 1                                                                                                                                      | Slc29a1       |



|             |       |                                                                                                                                           |                |
|-------------|-------|-------------------------------------------------------------------------------------------------------------------------------------------|----------------|
| 102104_f_at | -2.00 | membrane-spanning 4-domains, subfamily A, member 6B                                                                                       | Ms4a6b         |
| 98505_i_at  | -2.00 | coproporphyrinogen oxidase                                                                                                                | Cpo            |
| 94471_r_at  | -2.00 | solute carrier family 30 (zinc transporter), member 5                                                                                     | Slc30a5        |
| 93128_at    | -2.01 | neuropeptide Y receptor Y1                                                                                                                | Npy1r          |
| 162248_f_at | -2.01 | RIKEN cDNA 2010012D11 gene                                                                                                                | 2010012D11Rik  |
| 104282_at   | -2.01 | Mus musculus adult female vagina cDNA, RIKEN full-length enriched library, clone:9930106P14 product:unclassifiable, full insert sequence. |                |
| 162496_r_at | -2.01 | RIKEN cDNA 1010001M12 gene                                                                                                                | 1010001M12Rik  |
| 95401_at    | -2.01 | hypothetical protein MGC47289                                                                                                             | MGC47289       |
| 97980_at    | -2.01 | lymphotoxin B receptor                                                                                                                    | Ltbr           |
| 104388_at   | -2.01 | chemokine (C-C motif) ligand 9                                                                                                            | Ccl9           |
| 97652_at    | -2.01 | growth hormone releasing hormone receptor                                                                                                 | Ghrhr          |
| 160324_at   | -2.01 | RIKEN cDNA C330026P08 gene                                                                                                                | C330026P08Rik  |
| 160386_at   | -2.01 | RIKEN cDNA C130052I12 gene                                                                                                                | C130052I12Rik  |
| 93606_s_at  | -2.01 | immunoglobulin superfamily, member 4                                                                                                      | Igsf4          |
| 160233_at   | -2.01 | adenylate kinase 3 alpha-like                                                                                                             | Ak3l           |
| 101464_at   | -2.02 | tissue inhibitor of metalloproteinase 1                                                                                                   | Timp1          |
| 99070_at    | -2.02 | conserved helix-loop-helix ubiquitous kinase                                                                                              | Chuk           |
| 99338_at    | -2.02 | TBP-interacting protein                                                                                                                   | Tp120a-pending |
| 103992_f_at | -2.02 | ESTs, Weakly similar to hypothetical protein MGC10818 [Homo sapiens] [H.sapiens]                                                          |                |
| 161826_r_at | -2.02 | glutamate-ammonia ligase (glutamine synthase)                                                                                             | Glul           |
| 93045_at    | -2.02 | ATP-binding cassette, sub-family D (ALD), member 3                                                                                        | Abcd3          |
| 96672_at    | -2.02 | homeodomain only protein                                                                                                                  | Hop-pending    |
| 92532_at    | -2.03 | arginine vasopressin receptor 1A                                                                                                          | Avpr1a         |
| 104195_at   | -2.03 | RIKEN cDNA 5730408K05 gene                                                                                                                | 5730408K05Rik  |
| 103658_r_at | -2.03 | RIKEN cDNA 9230112N11 gene                                                                                                                | 9230112N11Rik  |
| 93729_at    | -2.03 | microtubule-associated protein 7                                                                                                          | Mtap7          |
| 103204_r_at | -2.03 | ESTs, Moderately similar to hypothetical protein FLJ23311 [Homo sapiens] [H.sapiens]                                                      |                |
| 95861_at    | -2.04 | ESTs                                                                                                                                      |                |
| 96640_at    | -2.04 | RIKEN cDNA 3110001A13 gene                                                                                                                | 3110001A13Rik  |
| 96486_at    | -2.04 | Mus musculus 3 days neonate thymus cDNA, RIKEN full-length enriched library, clone:A630052H06 product:unknown EST, full insert sequence.  |                |
| 161437_f_at | -2.04 | RIKEN cDNA 4930578F06 gene                                                                                                                | 4930578F06Rik  |
| 103755_at   | -2.04 | SH3 domain protein D19                                                                                                                    | Sh3d19         |
| 96123_at    | -2.04 | lipopolysaccharide binding protein                                                                                                        | Lbp            |
| 94378_at    | -2.04 | regulator of G-protein signaling 16                                                                                                       | Rgs16          |
| 96093_at    | -2.04 | open reading frame 11                                                                                                                     | ORF11          |
| 100906_at   | -2.05 | integrin beta 7                                                                                                                           | Itgb7          |
| 104201_at   | -2.05 | placental specific protein 1                                                                                                              | Plac1          |
| 99872_s_at  | -2.05 | ferritin light chain 1                                                                                                                    | Ftl1           |
| 93550_at    | -2.05 | cysteine-rich protein 2                                                                                                                   | Csrp2          |
| 160755_at   | -2.05 | kinesin family member 2C                                                                                                                  | Kif2c          |
| 93655_at    | -2.05 | upstream transcription factor 1                                                                                                           | Usf1           |
| 99993_at    | -2.05 | alanyl (membrane) aminopeptidase                                                                                                          | Anpep          |
| 93574_at    | -2.06 | serine (or cysteine) proteinase inhibitor, clade F), member 1                                                                             | Serpinf1       |
| 161356_at   | -2.06 | SMAF1                                                                                                                                     | SMAF1          |
| 160424_f_at | -2.06 | farnesyl diphosphate synthetase                                                                                                           | Fdps           |
| 94343_at    | -2.06 | DnaJ (Hsp40) homolog, subfamily C, member 3                                                                                               | Dnajc3         |
| 97450_s_at  | -2.06 | aldehyde dehydrogenase family 7, member A1                                                                                                | Aldh7a1        |
| 92222_f_at  | -2.07 | histocompatibility 2, Q region locus 1                                                                                                    | H2-Q1          |
| 162245_f_at | -2.07 | Mus musculus, Similar to hypothetical protein FLJ22789, clone IMAGE:5042703, mRNA                                                         |                |
| 161920_r_at | -2.07 | enhancer trap locus 1                                                                                                                     | Etl1           |
| 95709_at    | -2.07 | DNA segment, Chr 7, Wayne State University 86, expressed                                                                                  | D7Wsu86e       |
| 92193_r_at  | -2.08 | proprotein convertase subtilisin/kexin type 5                                                                                             | Pcsk5          |
| 100022_at   | -2.08 | cytokine inducible SH2-containing protein                                                                                                 | Cish           |
| 103391_at   | -2.08 | hypothetical protein C430041M20                                                                                                           | C430041M20     |
| 103451_at   | -2.08 | PTK2 protein tyrosine kinase 2 beta                                                                                                       | Ptk2b          |
| 93278_at    | -2.08 | sterol carrier protein 2, liver                                                                                                           | Scp2           |
| 95749_at    | -2.08 | arginine-rich, mutated in early stage tumors                                                                                              | Armet          |
| 103914_at   | -2.08 | RIKEN cDNA 1110033E03 gene                                                                                                                | 1110033E03Rik  |
| 161480_i_at | -2.08 | ribosomal protein, large, P1                                                                                                              | Rplp1          |
| 94369_at    | -2.08 | glucosamine-phosphate N-acetyltransferase 1                                                                                               | Gnpnat1        |

|             |       |                                                                                                                  |               |
|-------------|-------|------------------------------------------------------------------------------------------------------------------|---------------|
| 95880_s_at  | -2.09 | ESTs                                                                                                             |               |
| 103285_at   | -2.09 | methyl-CpG binding domain protein 4                                                                              | Mbd4          |
| 96963_s_at  | -2.09 |                                                                                                                  |               |
| 102202_s_at | -2.09 | Mpv17 transgene, kidney disease mutant                                                                           | Mpv17         |
| 102322_at   | -2.09 | UDP-glucose dehydrogenase                                                                                        | Ugdh          |
| 93542_at    | -2.09 | phosphotriesterase related                                                                                       | Pter          |
| 97247_at    | -2.09 | RIKEN cDNA 2610034N03 gene                                                                                       | 2610034N03Rik |
| 101515_at   | -2.09 | acyl-Coenzyme A oxidase 1, palmitoyl                                                                             | Acox1         |
| 104134_at   | -2.09 | ganglioside-induced differentiation-associated-protein 2                                                         | Gdap2         |
| 103448_at   | -2.09 | S100 calcium binding protein A8 (calgranulin A)                                                                  | S100a8        |
| 93434_at    | -2.10 | sulfotransferase-related protein SULT-X1                                                                         | Sult-x1       |
| 96231_at    | -2.10 | RIKEN cDNA 2010012D11 gene                                                                                       | 2010012D11Rik |
| 103990_at   | -2.10 | FBJ osteosarcoma oncogene B                                                                                      | Fosb          |
| 103028_at   | -2.10 | IL2-inducible T-cell kinase                                                                                      | Itk           |
| 104628_at   | -2.11 | mannosidase 2, alpha 1                                                                                           | Man2a1        |
| 94512_f_at  | -2.11 | archain 1                                                                                                        | Arcn1         |
| 103132_at   | -2.11 | ESTs, Moderately similar to S12207 hypothetical protein (B2 element) - mouse [M.musculus]                        |               |
| 101060_at   | -2.11 | glucose regulated protein                                                                                        | Grp58         |
| 161696_f_at | -2.11 | expressed sequence C77080                                                                                        | C77080        |
| 160576_at   | -2.11 | RIKEN cDNA 4930563P03 gene                                                                                       | 4930563P03Rik |
| 161788_f_at | -2.12 | endothelial differentiation sphingolipid G-protein-coupled receptor 1                                            | Edg1          |
| 97567_f_at  | -2.12 | immunoglobulin kappa chain variable 8 (V8)                                                                       | Igk-V8        |
| 94279_at    | -2.12 | RIKEN cDNA 0610008F14 gene                                                                                       | 0610008F14Rik |
| 99930_s_at  | -2.12 | presenilin 2                                                                                                     | Psen2         |
| 92768_s_at  | -2.12 | aminolevulinic acid synthase 2, erythroid                                                                        | Alas2         |
| 93500_at    | -2.12 | aminolevulinic acid synthase 1                                                                                   | Alas1         |
| 96336_at    | -2.12 | glycine amidinotransferase (L-arginine:glycine amidinotransferase)                                               | Gatm          |
| 160369_at   | -2.12 | RIKEN cDNA 2310076D10 gene                                                                                       | 2310076D10Rik |
| 98956_at    | -2.12 | RIKEN cDNA 1810049E02 gene                                                                                       | 1810049E02Rik |
| 93285_at    | -2.13 | dual specificity phosphatase 6                                                                                   | Dusp6         |
| 102783_at   | -2.13 | RIKEN cDNA 2310009E04 gene                                                                                       | 2310009E04Rik |
| 100325_at   | -2.14 | glycoprotein 49 A                                                                                                | Gp49a         |
| 96948_at    | -2.15 | quininoid dihydropteridine reductase                                                                             | Qdpr          |
| 101676_at   | -2.15 | glutathione peroxidase 3                                                                                         | Gpx3          |
| 160396_at   | -2.15 | RIKEN cDNA 0610013I17 gene                                                                                       | 0610013I17Rik |
| 94556_at    | -2.15 | RIKEN cDNA 2410004M09 gene                                                                                       | 2410004M09Rik |
| 96345_at    | -2.15 | serologically defined breast cancer antigen 84                                                                   | Sdbcag84      |
| 94644_at    | -2.15 | butyrylcholinesterase                                                                                            | Bche          |
| 98631_g_at  | -2.15 | NAD(P) dependent steroid dehydrogenase-like                                                                      | Nsdhl         |
| 160141_r_at | -2.16 | splicing factor, arginine/serine-rich 1 (ASF/SF2)                                                                | Sfrs1         |
| 161970_f_at | -2.16 | 3-hydroxy-3-methylglutaryl-Coenzyme A lyase                                                                      | Hmgcl         |
| 104412_at   | -2.17 | guanine nucleotide binding protein, alpha inhibiting 1                                                           | Gnai1         |
| 99378_f_at  | -2.17 | histocompatibility 2, Q region locus 1                                                                           | H2-Q1         |
| 103845_at   | -2.17 | solute carrier family 31, member 1                                                                               | Slc31a1       |
| 160829_at   | -2.17 | pleckstrin homology-like domain, family A, member 1                                                              | Phlda1        |
| 161345_f_at | -2.17 | cytochrome P450, 7b1                                                                                             | Cyp7b1        |
| 161495_r_at | -2.17 | creatine kinase, mitochondrial 1, ubiquitous                                                                     | Ckmt1         |
| 95228_f_at  | -2.18 | angiogenin-like                                                                                                  | Angl          |
| 103909_at   | -2.18 | copper chaperone for superoxide dismutase                                                                        | Ccs           |
| 93236_s_at  | -2.18 | thymidylate synthase                                                                                             | Tyms          |
| 97402_at    | -2.18 | thioether S-methyltransferase                                                                                    | Temt          |
| 94418_at    | -2.18 | long chain fatty acyl elongase                                                                                   | Lce-pending   |
| 104626_at   | -2.18 | RIKEN cDNA 2700018N07 gene                                                                                       | 2700018N07Rik |
| 94063_at    | -2.19 | sema domain, immunoglobulin domain (Ig), transmembrane domain (TM) and short cytoplasmic domain, (semaphorin) 4A | Sema4a        |
| 94247_at    | -2.19 | E26 avian leukemia oncogene 2, 3' domain                                                                         | Ets2          |
| 161912_r_at | -2.19 | numb gene homolog (Drosophila)                                                                                   | Numb          |
| 161411_i_at | -2.19 | EST                                                                                                              |               |
| 102425_at   | -2.19 | transducin-like enhancer of split 1, homolog of Drosophila E(spl)                                                | Tle1          |
| 161530_r_at | -2.19 | sema domain, immunoglobulin domain (Ig), transmembrane domain (TM) and short cytoplasmic domain, (semaphorin) 4A | Sema4a        |
| 104165_at   | -2.19 | vanin 1                                                                                                          | Vnn1          |
| 100772_g_at | -2.19 | B-cell linker                                                                                                    | Blnk          |

|                                  |       |                                                                                      |                |
|----------------------------------|-------|--------------------------------------------------------------------------------------|----------------|
| AFFX-PyruCarbMur/L<br>09192_3_at | -2.19 | pyruvate carboxylase                                                                 | Pcx            |
| 102125_f_at                      | -2.20 | serine protease inhibitor 6                                                          | Spi6           |
| 104211_at                        | -2.20 | integrin alpha 3                                                                     | Itga3          |
| 93573_at                         | -2.20 | metallothionein 1                                                                    | Mt1            |
| 92736_at                         | -2.20 | solute carrier family 7 (cationic amino acid transporter, y+ system), member 2       | Slc7a2         |
| 101028_i_at                      | -2.21 | actin, alpha, cardiac                                                                | Actc1          |
| 93202_at                         | -2.21 | 5' nucleotidase, ecto                                                                | Nt5e           |
| 95442_at                         | -2.22 | hypothetical protein MGC18837                                                        | MGC18837       |
| 101009_at                        | -2.22 | keratin complex 2, basic, gene 8                                                     | Krt2-8         |
| 161571_f_at                      | -2.22 | complement component 1, r subcomponent                                               | C1r            |
| 98923_at                         | -2.23 | RNA cyclase homolog                                                                  | Rnac-pending   |
| 104325_at                        | -2.23 | RIKEN cDNA 1110025G12 gene                                                           | 1110025G12Rik  |
| 160509_at                        | -2.24 | chitinase, acidic                                                                    | Chia-pending   |
| 97132_at                         | -2.24 | hypothetical protein MGC36039                                                        | MGC36039       |
| 97449_at                         | -2.24 | aldehyde dehydrogenase family 7, member A1                                           | Aldh7a1        |
| 93867_at                         | -2.24 | ATP-binding cassette, sub-family D (ALD), member 4                                   | Abcd4          |
| 98322_at                         | -2.24 | solute carrier family 22 (organic cation transporter), member 5                      | Slc22a5        |
| 98408_at                         | -2.25 | hematopoietically expressed homeobox                                                 | Hhex           |
| 104547_at                        | -2.25 | dihydrofolate reductase                                                              | Dhfr           |
| 101656_f_at                      | -2.25 | immunoglobulin kappa chain variable 8 (V8)                                           | Igk-V8         |
| 96502_at                         | -2.25 | phosphate regulating gene with homologies to endopeptidases on the X chromosome      | Phex           |
| 160832_at                        | -2.25 | low density lipoprotein receptor                                                     | Ldlr           |
| 95030_at                         | -2.25 | prolactin receptor                                                                   | Prlr           |
| 161763_r_at                      | -2.25 | phosphatidylinositol-4-phosphate 5-kinase, type II, gamma                            | Pip5k2c        |
| 102337_s_at                      | -2.26 | Fc receptor, IgG, low affinity IIb                                                   | Fcgr2b         |
| 102804_at                        | -2.26 | CEA-related cell adhesion molecule 1                                                 | Ceacam1        |
| 93445_at                         | -2.26 | apoptosis inhibitor 6                                                                | Api6           |
| 98398_s_at                       | -2.26 | apolipoprotein B editing complex 1                                                   | Apobec1        |
| 95787_s_at                       | -2.26 | sterol carrier protein 2, liver                                                      | Scp2           |
| 94241_at                         | -2.26 | RIKEN cDNA 1300003G02 gene                                                           | 1300003G02Rik  |
| 98112_r_at                       | -2.26 | leucine aminopeptidase 3                                                             | Lap3           |
| 100633_at                        | -2.27 | RIKEN cDNA 2810484M10 gene                                                           | 2810484M10Rik  |
| 96735_at                         | -2.27 | serologically defined colon cancer antigen 28                                        | Sdccag28       |
| 92291_f_at                       | -2.27 | expressed sequence AI194696                                                          | AI194696       |
| 98859_at                         | -2.28 | acid phosphatase 5, tartrate resistant                                               | Acp5           |
| 161161_r_at                      | -2.28 | expressed in non-metastatic cells 1, protein (NM23A) (nucleoside diphosphate kinase) | Nme1           |
| 92746_at                         | -2.29 | N-acetyltransferase 2 (arylamine N-acetyltransferase)                                | Nat2           |
| 97257_at                         | -2.29 | CGI-83 protein                                                                       | Cgi-83-pending |
| 103498_at                        | -2.29 | glucagon receptor                                                                    | Gcgr           |
| 94232_at                         | -2.30 | cyclin D1                                                                            | Ccnd1          |
| 161357_r_at                      | -2.30 | glutathione S-transferase, mu 2                                                      | Gstm2          |
| 161964_r_at                      | -2.30 | protein kinase C, zeta                                                               | Prkcz          |
| 100944_at                        | -2.31 | ESTs                                                                                 |                |
| 104179_at                        | -2.32 | ADP-ribosylation factor 6                                                            | Arf6           |
| 98315_at                         | -2.32 | tectorin alpha                                                                       | Tecta          |
| 93842_at                         | -2.32 | hypothetical protein MGC6998                                                         | MGC6998        |
| 103986_at                        | -2.33 | inhibin beta-C                                                                       | Inhbc          |
| 161524_r_at                      | -2.33 | glucose phosphate isomerase 1                                                        | Gpi1           |
| 100491_at                        | -2.33 | solute carrier family 16 (monocarboxylic acid transporters), member 2                | Slc16a2        |
| 102843_s_at                      | -2.33 |                                                                                      |                |
| 99098_at                         | -2.33 | farnesyl diphosphate synthetase                                                      | Fdps           |
| 160482_at                        | -2.33 | acetyl-Coenzyme A acyltransferase 1                                                  | Acaa1          |
| 94278_at                         | -2.34 | lymphocyte cytosolic protein 1                                                       | Lcp1           |
| 96025_g_at                       | -2.34 | S-adenosylhomocysteine hydrolase                                                     | Ahcy           |
| 99038_at                         | -2.35 | adenylosuccinate synthetase 2, non muscle                                            | Adss2          |
| 98409_at                         | -2.35 | myosin IB                                                                            | Myo1b          |
| 103810_at                        | -2.36 | transformation related protein 63                                                    | Trp63          |
| 96831_at                         | -2.36 | protein disulfide isomerase-related                                                  | Pdir-pending   |
| 161536_r_at                      | -2.36 | dual specificity phosphatase 6                                                       | Dusp6          |
| 101019_at                        | -2.36 | cathepsin C                                                                          | Ctsc           |

|             |       |                                                                                                                                                                                                                                                        |               |
|-------------|-------|--------------------------------------------------------------------------------------------------------------------------------------------------------------------------------------------------------------------------------------------------------|---------------|
| 99108_s_at  | -2.37 |                                                                                                                                                                                                                                                        |               |
| 104413_at   | -2.37 | Mus musculus 7 days embryo whole body cDNA, RIKEN full-length enriched library, clone:C430014O21 product:similar to UDP-GLUCURONIC ACID/UDP-N-ACETYL GALACTOSAMINE TRANSPORTER (UDP-GLCA/UDP-GALNAC TRANSPORTER) [Homo sapiens], full insert sequence. |               |
| 97924_at    | -2.38 | UDP-N-acetylglucosamine-2-epimerase/N-acetylmannosamine kinase                                                                                                                                                                                         | Uae1          |
| 99649_at    | -2.38 | glutamate-cysteine ligase, catalytic subunit                                                                                                                                                                                                           | Gclc          |
| 93557_at    | -2.38 | selenophosphate synthetase 2                                                                                                                                                                                                                           | Sps2          |
| 160085_at   | -2.38 | thiosulfate sulfurtransferase, mitochondrial                                                                                                                                                                                                           | Tst           |
| 97525_at    | -2.38 | glycerol kinase                                                                                                                                                                                                                                        | Gyk           |
| 94417_at    | -2.38 | RIKEN cDNA 2010008E23 gene                                                                                                                                                                                                                             | 2010008E23Rik |
| 102161_f_at | -2.39 |                                                                                                                                                                                                                                                        |               |
| 94325_at    | -2.39 | 3-hydroxy-3-methylglutaryl-Coenzyme A synthase 1                                                                                                                                                                                                       | Hmgcs1        |
| 93320_at    | -2.39 | carnitine palmitoyltransferase 1, liver                                                                                                                                                                                                                | Cpt1a         |
| 161528_r_at | -2.39 | polymerase (DNA directed), delta 1, catalytic subunit (125kDa)                                                                                                                                                                                         | Pold1         |
| 98346_at    | -2.40 | RIKEN cDNA 9530051K01 gene                                                                                                                                                                                                                             | 9530051K01Rik |
| 101578_f_at | -2.40 | actin, beta, cytoplasmic                                                                                                                                                                                                                               | Actb          |
| 92898_at    | -2.40 | cytochrome P450, 7b1                                                                                                                                                                                                                                   | Cyp7b1        |
| 93155_at    | -2.40 | RIKEN cDNA 1500032A09 gene                                                                                                                                                                                                                             | 1500032A09Rik |
| 162479_f_at | -2.41 | ferritin light chain 1                                                                                                                                                                                                                                 | Ftl1          |
| 95366_at    | -2.42 |                                                                                                                                                                                                                                                        |               |
| 95545_at    | -2.42 | insulin-like growth factor 1                                                                                                                                                                                                                           | Igf1          |
| 95244_at    | -2.42 | zinc finger protein 40                                                                                                                                                                                                                                 | Zfp40         |
| 95349_g_at  | -2.42 | chemokine (C-X-C motif) ligand 1                                                                                                                                                                                                                       | Cxcl1         |
| 93495_at    | -2.42 | peroxiredoxin 4                                                                                                                                                                                                                                        | Prdx4         |
| 101408_at   | -2.43 | guanidinoacetate methyltransferase                                                                                                                                                                                                                     | Gamt          |
| 96528_at    | -2.43 | ADP-ribosylation-like 4                                                                                                                                                                                                                                | Arl4          |
| 103660_at   | -2.43 | peroxisomal biogenesis factor 11a                                                                                                                                                                                                                      | Pex11a        |
| 102701_at   | -2.43 | cytochrome P450, 2b10, phenobarbitol inducible, type b                                                                                                                                                                                                 | Cyp2b10       |
| 98533_at    | -2.44 | cytochrome b-5                                                                                                                                                                                                                                         | Cyb5          |
| 161326_f_at | -2.44 | serine (or cysteine) proteinase inhibitor, clade A, member 6                                                                                                                                                                                           | Serpina6      |
| 101561_at   | -2.45 | metallothionein 2                                                                                                                                                                                                                                      | Mt2           |
| 97772_at    | -2.45 | plasminogen activator, urokinase                                                                                                                                                                                                                       | Plau          |
| 96026_at    | -2.45 | S-adenosylhomocysteine hydrolase                                                                                                                                                                                                                       | Ahcy          |
| 160706_at   | -2.45 | RIKEN cDNA 3110004L20 gene                                                                                                                                                                                                                             | 3110004L20Rik |
| 160335_at   | -2.45 | glutamate-cysteine ligase , modifier subunit                                                                                                                                                                                                           | Gclm          |
| 94322_at    | -2.46 | squalene epoxidase                                                                                                                                                                                                                                     | Sqle          |
| 160350_at   | -2.46 | glutathione transferase zeta 1 (maleylacetoacetate isomerase)                                                                                                                                                                                          | Gstz1         |
| 161695_f_at | -2.46 | solute carrier family 6 (neurotransmitter transporter, serotonin), member 4                                                                                                                                                                            | Slc6a4        |
| 160104_at   | -2.46 | expressed sequence AI195443                                                                                                                                                                                                                            | AI195443      |
| 103665_at   | -2.46 | long chain fatty acyl elongase                                                                                                                                                                                                                         | Lce-pending   |
| 99107_at    | -2.47 | growth hormone receptor                                                                                                                                                                                                                                | Ghr           |
| 102852_at   | -2.47 | cadherin 2                                                                                                                                                                                                                                             | Cdh2          |
| 101659_at   | -2.48 | hydroxysteroid dehydrogenase-2, delta<5>-3-beta                                                                                                                                                                                                        | Hsd3b2        |
| 161422_f_at | -2.48 | uncoupling protein 1, mitochondrial                                                                                                                                                                                                                    | Ucp1          |
| 160460_at   | -2.49 | suppressor of K+ transport defect 3                                                                                                                                                                                                                    | Skd3          |
| 94209_g_at  | -2.50 | protein disulfide isomerase-related protein                                                                                                                                                                                                            | P5-pending    |
| 99959_at    | -2.50 | adenylate kinase 4                                                                                                                                                                                                                                     | Ak4           |
| 101853_f_at | -2.51 | complement component factor h                                                                                                                                                                                                                          | Cfh           |
| 95348_at    | -2.51 | chemokine (C-X-C motif) ligand 1                                                                                                                                                                                                                       | Cxcl1         |
| 97320_at    | -2.52 | RIKEN cDNA 1600025H15 gene                                                                                                                                                                                                                             | 1600025H15Rik |
| 93516_at    | -2.52 | t-complex testis expressed 1                                                                                                                                                                                                                           | Tctex1        |
| 103531_f_at | -2.52 | RIKEN cDNA 1300013B24 gene                                                                                                                                                                                                                             | 1300013B24Rik |
| 98466_r_at  | -2.52 | interferon activated gene 204                                                                                                                                                                                                                          | Ifi204        |
| 96243_f_at  | -2.53 | aldehyde dehydrogenase 9, subfamily A1                                                                                                                                                                                                                 | Aldh9a1       |
| 98447_at    | -2.53 | CCAAT/enhancer binding protein (C/EBP), alpha                                                                                                                                                                                                          | Cebpa         |
| 160850_at   | -2.54 | folypolyglutamyl synthetase                                                                                                                                                                                                                            | Fpgs          |
| 101964_at   | -2.55 | transketolase                                                                                                                                                                                                                                          | Tkt           |
| 99580_s_at  | -2.57 | UDP-glucuronosyltransferase 1 family, member 1                                                                                                                                                                                                         | Ugt1a1        |
| 95060_at    | -2.57 | solute carrier family 16 (monocarboxylic acid transporters), member 7                                                                                                                                                                                  | Slc16a7       |
| 96627_at    | -2.58 | phenylalkylamine Ca2+ antagonist (emopamil) binding protein                                                                                                                                                                                            | Ebp           |
| 101539_f_at | -2.58 | carboxylesterase 3                                                                                                                                                                                                                                     | Ces3          |
| 160936_at   | -2.58 | RIKEN cDNA 1810049E02 gene                                                                                                                                                                                                                             | 1810049E02Rik |
| 94906_at    | -2.59 | alcohol dehydrogenase 1 (class I)                                                                                                                                                                                                                      | Adh1          |
| 92537_g_at  | -2.59 |                                                                                                                                                                                                                                                        |               |

|             |       |                                                                                |               |
|-------------|-------|--------------------------------------------------------------------------------|---------------|
| 94338_g_at  | -2.59 | growth arrest specific 2                                                       | Gas2          |
| 102840_at   | -2.60 | protein tyrosine phosphatase, non-receptor type 12                             | Ptpn12        |
| 99638_at    | -2.61 | procollagen, type XVIII, alpha 1                                               | Col18a1       |
| 102373_at   | -2.61 | glutamyl aminopeptidase                                                        | Enpep         |
| 93015_at    | -2.62 | glutathione S-transferase, alpha 3                                             | Gsta3         |
| 97420_at    | -2.63 | leucine-rich alpha-2-glycoprotein                                              | Lrg-pending   |
| 104447_r_at | -2.63 | RIKEN cDNA 4933428G09 gene                                                     | 4933428G09Rik |
| 102313_at   | -2.63 | GTP cyclohydrolase 1                                                           | Gch           |
| 160571_at   | -2.64 | isocitrate dehydrogenase 1 (NADP+), soluble                                    | Idh1          |
| 103087_at   | -2.64 | sulfotransferase family 1A, phenol-preferring, member 1                        | Sult1a1       |
| 97243_at    | -2.64 | solute carrier family 9 (sodium/hydrogen exchanger), isoform 3 regulator 1     | Slc9a3r1      |
| 93747_at    | -2.65 | RIKEN cDNA 4930523M17 gene                                                     | 4930523M17Rik |
| 104696_at   | -2.66 | cathepsin E                                                                    | Ctse          |
| 161401_f_at | -2.66 | aldehyde dehydrogenase family 3, subfamily A2                                  | Aldh3a2       |
| 95019_at    | -2.67 | glutathione S-transferase, theta 1                                             | Gstt1         |
| 93868_at    | -2.67 | NAD(P) dependent steroid dehydrogenase-like                                    | Nsdhl         |
| 97173_f_at  | -2.70 | histocompatibility 2, T region locus 23                                        | H2-T23        |
| 99184_at    | -2.71 | cysteine sulfinic acid decarboxylase                                           | Csad          |
| 96712_at    | -2.71 | SPARC related modular calcium binding 1                                        | Smoc1         |
| 101531_at   | -2.71 | aldolase 2, B isoform                                                          | Aldo2         |
| 93496_at    | -2.72 | RIKEN cDNA 1110059L23 gene                                                     | 1110059L23Rik |
| 104480_at   | -2.72 | desmoglein 2                                                                   | Dsg2          |
| 101470_at   | -2.73 | hypothetical protein MGC38950                                                  | MGC38950      |
| 161870_at   | -2.73 | ubiquitin specific protease 15                                                 | Usp15         |
| 98989_at    | -2.75 | 7-dehydrocholesterol reductase                                                 | Dhcr7         |
| 96090_g_at  | -2.76 | RIKEN cDNA 4931406C07 gene                                                     | 4931406C07Rik |
| 96758_s_at  | -2.79 | SEC14-like 2 (S. cerevisiae)                                                   | Sec14l2       |
| 96038_at    | -2.79 | ribonuclease, RNase A family 4                                                 | Rnase4        |
| 103335_at   | -2.81 | lectin, galactose binding, soluble 9                                           | Lgals9        |
| 102707_f_at | -2.81 | serine (or cysteine) proteinase inhibitor, clade A, member 3C                  | Serpina3c     |
| 161609_at   | -2.81 | regulator of G-protein signaling 16                                            | Rgs16         |
| 94432_at    | -2.81 | sialyltransferase 1 (beta-galactoside alpha-2,6-sialyltransferase)             | Siat1         |
| 161900_f_at | -2.82 | ESTs, Moderately similar to B3AR_MOUSE Beta-3 adrenergic receptor [M.musculus] |               |
| 160477_at   | -2.82 | NADH dehydrogenase (ubiquinone) 1 alpha subcomplex, 4                          | Ndufa4        |
| 92800_i_at  | -2.83 | ATP synthase, H+ transporting, mitochondrial F1 complex, gamma polypeptide 1   | Atp5c1        |
| 95148_at    | -2.83 | adenylate kinase 2                                                             | Ak2           |
| 101071_at   | -2.84 | myosin heavy chain, cardiac muscle, adult                                      | Myhca         |
| 99521_at    | -2.84 | adenylate kinase 4                                                             | Ak4           |
| 93827_at    | -2.85 | tryptophan 2,3-dioxygenase                                                     | Tdo2          |
| 102820_at   | -2.86 |                                                                                |               |
| 94834_at    | -2.86 | cathepsin H                                                                    | Ctsh          |
| 93485_at    | -2.86 | protein tyrosine phosphatase, receptor type, D                                 | Ptprd         |
| 101908_s_at | -2.86 | CEA-related cell adhesion molecule 2                                           | Ceacam2       |
| 102805_at   | -2.87 | CEA-related cell adhesion molecule 1                                           | Ceacam1       |
| 92918_at    | -2.88 | coagulation factor VII                                                         | F7            |
| 103934_at   | -2.88 | gamma-aminobutyric acid (GABA-A) transporter 3                                 | Gabt3         |
| 93840_at    | -2.88 | apolipoprotein M                                                               | Apom          |
| 102171_r_at | -2.89 | nuclear receptor subfamily 1, group I, member 3                                | Nr1i3         |
| 97456_at    | -2.89 | fatty acid Coenzyme A ligase, long chain 5                                     | Facl5         |
| 99811_at    | -2.89 | neuropeptide Y receptor Y6                                                     | Npy6r         |
| 160119_at   | -2.89 | matrix gamma-carboxylglutamate (gla) protein                                   | Mglap         |
| 160391_at   | -2.89 | RIKEN cDNA 0710001O03 gene                                                     | 0710001O03Rik |
| 96047_at    | -2.90 | retinol binding protein 4, plasma                                              | Rbp4          |
| 104603_at   | -2.91 | glutathione S-transferase, theta 2                                             | Gstt2         |
| 100136_at   | -2.91 | lysosomal membrane glycoprotein 2                                              | Lamp2         |
| 103506_f_at | -2.91 | desmocollin 2                                                                  | Dsc2          |
| 162483_f_at | -2.93 | procollagen, type XVIII, alpha 1                                               | Col18a1       |
| 104065_at   | -2.94 | ER degradation enhancing alpha mannosidase-like                                | Edem-pending  |
| 95043_at    | -2.95 | similar to CYTOCHROME P450 2C22 (CYP11C22) (P450 MD) (P450 P49)                | LOC226105     |
| 93837_at    | -2.97 | kininogen                                                                      | Kng           |
| 96603_at    | -2.98 | quiescin Q6                                                                    | Qscn6         |
| 94777_at    | -2.98 | albumin 1                                                                      | Alb1          |
| 96227_at    | -2.99 | serine (or cysteine) proteinase inhibitor, clade A, member 6                   | Serpina6      |

|             |       |                                                                            |                |
|-------------|-------|----------------------------------------------------------------------------|----------------|
| 97969_at    | -3.00 | nuclear receptor subfamily 1, group H, member 4                            | Nr1h4          |
| 102142_r_at | -3.00 | ESTs, Weakly similar to PBAS_MOUSE Probasin precursor (PB) [M.musculus]    |                |
| 160306_at   | -3.00 | thyroid hormone responsive SPOT14 homolog (Rattus)                         | Thrsp          |
| 99019_at    | -3.00 | P450 (cytochrome) oxidoreductase                                           | Por            |
| 103944_at   | -3.01 | RAD51-like 1 (S. cerevisiae)                                               | Rad5111        |
| 99559_at    | -3.02 | aldehyde dehydrogenase family 3, subfamily A2                              | Aldh3a2        |
| 104004_at   | -3.03 | RIKEN cDNA 3110027H23 gene                                                 | 3110027H23Rik  |
| 104273_at   | -3.03 | bile acid-Coenzyme A: amino acid N-acyltransferase                         | Baat           |
| 93872_at    | -3.03 | glial cell line derived neurotrophic factor family receptor alpha 1        | Gfra1          |
| 160611_at   | -3.03 | expressed sequence AW111961                                                | AW111961       |
| 104566_at   | -3.04 | argininosuccinate lyase                                                    | Asl            |
| 96269_at    | -3.05 | RIKEN cDNA 4832416K17 gene                                                 | 4832416K17Rik  |
| 93351_at    | -3.06 | hydroxyprostaglandin dehydrogenase 15 (NAD)                                | Hpgd           |
| 97427_at    | -3.06 | mannose binding lectin, serum (C)                                          | Mbl2           |
| 160564_at   | -3.06 | lipocalin 2                                                                | Lcn2           |
| 102035_at   | -3.06 | thiopurine methyltransferase                                               | Tpmt           |
| 94270_at    | -3.06 | keratin complex 1, acidic, gene 18                                         | Krt1-18        |
| 104286_at   | -3.07 | solute carrier family 38, member 4                                         | Slc38a4        |
| 93013_at    | -3.09 | inhibitor of DNA binding 2                                                 | Idb2           |
| 95356_at    | -3.10 | apolipoprotein E                                                           | Apoe           |
| 99452_at    | -3.10 | liver-specific bHLH-Zip transcription factor                               | Lisch7-pending |
| 103519_at   | -3.10 | carboxylesterase 1                                                         | Ces1           |
| 96795_at    | -3.12 | fatty acid amide hydrolase                                                 | Faah           |
| 99926_at    | -3.12 |                                                                            |                |
| 96806_at    | -3.12 | RIKEN cDNA 2610511G02 gene                                                 | 2610511G02Rik  |
| 101571_g_at | -3.12 | insulin-like growth factor binding protein 4                               | Igfbp4         |
| 96024_at    | -3.13 | S-adenosylhomocysteine hydrolase                                           | Ahcy           |
| 104506_at   | -3.14 | nuclear receptor subfamily 1, group I, member 3                            | Nr1i3          |
| 98588_at    | -3.16 | fumarylacetoacetate hydrolase                                              | Fah            |
| 96048_at    | -3.16 | heat-responsive protein 12                                                 | Hrsp12         |
| 98459_at    | -3.16 | serine hydroxymethyl transferase 1 (soluble)                               | Shmt1          |
| 160088_at   | -3.17 | flavin containing monooxygenase 5                                          | Fmo5           |
| 94414_at    | -3.22 | ornithine transcarbamylase                                                 | Otc            |
| 93026_at    | -3.22 | microsomal glutathione S-transferase 1                                     | Mgst1          |
| 93766_at    | -3.25 | regucalcin                                                                 | Rgn            |
| 103085_at   | -3.25 | heme binding protein 1                                                     | Hebp1          |
| 102998_at   | -3.26 | cytochrome P450, 1a2, aromatic compound inducible                          | Cyp1a2         |
| 93996_at    | -3.28 | cytochrome P450, 2e1, ethanol inducible                                    | Cyp2e1         |
| 102748_at   | -3.28 | coagulation factor V                                                       | F5             |
| 101575_i_at | -3.28 | serine protease inhibitor 1-2                                              | Spi1-2         |
| 101565_f_at | -3.30 | serine protease inhibitor 1-3                                              | Spi1-3         |
| 104658_at   | -3.30 | leukemia inhibitory factor receptor                                        | Lifr           |
| 104484_at   | -3.31 | sulfotransferase, hydroxysteroid preferring 2                              | Sth2           |
| 93975_at    | -3.32 | RIKEN cDNA 1300002F13 gene                                                 | 1300002F13Rik  |
| 104519_at   | -3.32 | inter-alpha trypsin inhibitor, heavy chain 2                               | Itih2          |
| 101538_i_at | -3.32 | carboxylesterase 3                                                         | Ces3           |
| 103422_at   | -3.33 | CD1d1 antigen                                                              | Cd1d1          |
| 95350_at    | -3.33 | transthyretin                                                              | Ttr            |
| 101329_f_at | -3.34 | immunoglobulin kappa chain variable 8 (V8)                                 | Igk-V8         |
| 102861_at   | -3.35 | solute carrier family 22 (organic cation transporter), member 1-like       | Slc22a1l       |
| 99083_at    | -3.36 | expressed sequence AI266900                                                | AI266900       |
| 95137_at    | -3.36 | RIKEN cDNA 1810014L12 gene                                                 | 1810014L12Rik  |
| 103257_at   | -3.36 | expressed sequence AW109744                                                | AW109744       |
| 100339_at   | -3.37 | solute carrier family 10 (sodium/bile acid cotransporter family), member 1 | Slc10a1        |
| 99854_at    | -3.38 | sulfotransferase-related protein SULT-X2                                   | Sult-x2        |
| 92835_at    | -3.38 | camello-like 1                                                             | Cml1           |
| 99463_at    | -3.40 | cytochrome P450, steroid inducible 3a13                                    | Cyp3a13        |
| 103714_at   | -3.41 | RIKEN cDNA 0610009A07 gene                                                 | 0610009A07Rik  |
| 101897_g_at | -3.42 | CD1d2 antigen                                                              | Cd1d2          |
| 101585_at   | -3.43 | progesterone receptor membrane component 1                                 | Pgrmc1         |
| 94778_at    | -3.43 | aldehyde dehydrogenase family 1, subfamily A7                              | Aldh1a7        |
| 94383_at    | -3.43 | tissue factor pathway inhibitor 2                                          | Tfpi2          |
| 102847_s_at | -3.43 | cytochrome P450, 2a4                                                       | Cyp2a4         |
| 104643_at   | -3.44 | cDNA sequence BC037006                                                     | BC037006       |

|             |       |                                                                                    |               |
|-------------|-------|------------------------------------------------------------------------------------|---------------|
| 103333_at   | -3.46 | glucose-6-phosphatase, catalytic                                                   | G6pc          |
| 98627_at    | -3.47 | insulin-like growth factor binding protein 2                                       | Igfbp2        |
| 102769_f_at | -3.47 | sterol-C5-desaturase (fungal ERG3, delta-5-desaturase) homolog (S. cerevisiae)     | Sc5d          |
| 101881_g_at | -3.48 | procollagen, type XVIII, alpha 1                                                   | Col18a1       |
| 96918_at    | -3.48 | fructose bisphosphatase 1                                                          | Fbp1          |
| 97825_at    | -3.49 | p53 apoptosis effector related to Pmp22                                            | Perp-pending  |
| 95339_r_at  | -3.49 | matrix metalloproteinase 12                                                        | Mmp12         |
| 97316_at    | -3.50 | RIKEN cDNA 1300002P22 gene                                                         | 1300002P22Rik |
| 97867_at    | -3.52 | hydroxysteroid 11-beta dehydrogenase 1                                             | Hsd11b1       |
| 99571_at    | -3.54 | hypothetical protein MGC29978                                                      | MGC29978      |
| 94743_f_at  | -3.55 | complement component factor h                                                      | Cfh           |
| 103728_at   | -3.56 | ESTs                                                                               |               |
| 101735_f_at | -3.56 | angiogenin related protein                                                         | Angrp         |
| 93770_at    | -3.57 | cytochrome P450, steroid inducible 3a11                                            | Cyp3a11       |
| 92600_f_at  | -3.58 | cytochrome P450, 4a10                                                              | Cyp4a10       |
| 95546_g_at  | -3.60 | insulin-like growth factor 1                                                       | Igf1          |
| 102816_at   | -3.62 | serine (or cysteine) proteinase inhibitor, clade A, member 3M                      | Serpina3m     |
| 101638_s_at | -3.63 | cytochrome P450, 3a16                                                              | Cyp3a16       |
| 94440_at    | -3.64 | expressed sequence AI876593                                                        | AI876593      |
| 96938_at    | -3.64 | kidney expressed gene 1                                                            | Keg1          |
| 94493_at    | -3.65 | claudin 3                                                                          | Cldn3         |
| 102768_i_at | -3.66 | sterol-C5-desaturase (fungal ERG3, delta-5-desaturase) homolog (S. cerevisiae)     | Sc5d          |
| 94045_at    | -3.68 | alpha 1 microglobulin/bikunin                                                      | Ambp          |
| 103389_at   | -3.68 | aminoadipate-semialdehyde synthase                                                 | Aass          |
| 103670_at   | -3.69 | cytochrome P450, 2a12                                                              | Cyp2a12       |
| 95566_at    | -3.69 | glycosylphosphatidylinositol specific phospholipase D1                             | Gpld1         |
| 96763_at    | -3.70 | sarcosine dehydrogenase                                                            | Sardh         |
| 98295_at    | -3.70 | cytochrome P450, 2c39                                                              | Cyp2c39       |
| 104659_g_at | -3.71 | leukemia inhibitory factor receptor                                                | Lifr          |
| 92612_at    | -3.71 | solute carrier family 27 (fatty acid transporter), member 5                        | Slc27a5       |
| 101898_s_at | -3.71 | histocompatibility 2, Q region locus 10                                            | H2-Q10        |
| 103977_at   | -3.72 | coagulation factor X                                                               | F10           |
| 92851_at    | -3.72 | ceruloplasmin                                                                      | Cp            |
| 160387_at   | -3.74 | RIKEN cDNA 1110055L24 gene                                                         | 1110055L24Rik |
| 93824_at    | -3.74 | hypothetical protein 4732433M03                                                    | 4732433M03    |
| 100634_at   | -3.75 | retinol dehydrogenase 7                                                            | Rdh7          |
| 95407_at    | -3.75 | phenylalanine hydroxylase                                                          | Pah           |
| 101537_at   | -3.76 | esterase 1                                                                         | Es1           |
| 93109_f_at  | -3.76 | serine protease inhibitor 1-4                                                      | Spi1-4        |
| 101566_f_at | -3.77 |                                                                                    |               |
| 104007_at   | -3.77 | solute carrier family 25 (mitochondrial carrier; ornithine transporter), member 15 | Slc25a15      |
| 95727_at    | -3.77 | apolipoprotein A-V                                                                 | Apoa5         |
| 97889_at    | -3.79 | fatty acid binding protein 2, intestinal                                           | Fabp2         |
| 101576_f_at | -3.81 | serine protease inhibitor 1-2                                                      | Spi1-2        |
| 100966_at   | -3.85 | serine (or cysteine) proteinase inhibitor, clade D, member 1                       | Serpind1      |
| 160478_r_at | -3.86 | ribosomal protein L32                                                              | Rpl32         |
| 96346_at    | -3.87 | cysteine dioxygenase 1, cytosolic                                                  | Cdo1          |
| 103703_f_at | -3.89 | RIKEN cDNA C730048C13 gene                                                         | C730048C13Rik |
| 101862_at   | -3.90 | cytochrome P450, 2b9, phenobarbital inducible, type a                              | Cyp2b9        |
| 95728_g_at  | -3.91 | apolipoprotein A-V                                                                 | Apoa5         |
| 94993_f_at  | -3.93 | complement component factor h                                                      | Cfh           |
| 160537_at   | -3.95 | N-sulfotransferase                                                                 | Sultn         |
| 101574_f_at | -3.96 | serine protease inhibitor 1-5                                                      | Spi1-5        |
| 101899_at   | -3.96 | coagulation factor II                                                              | F2            |
| 99422_at    | -3.97 | RIKEN cDNA 1600014C10 gene                                                         | 1600014C10Rik |
| 160639_at   | -3.98 | hepsin                                                                             | Hpn           |
| 99862_at    | -3.99 | alpha-2-HS-glycoprotein                                                            | Ahsg          |
| 101682_f_at | -4.00 | major urinary protein 4                                                            | Mup4          |
| 96134_at    | -4.05 | deleted in polyposis 1-like 1                                                      | Dp111         |
| 100916_at   | -4.06 | solute carrier family 22 (organic cation transporter), member 1                    | Slc22a1       |
| 103227_at   | -4.06 | expressed sequence AI788959                                                        | AI788959      |

|             |       |                                                                                             |               |
|-------------|-------|---------------------------------------------------------------------------------------------|---------------|
| 97418_at    | -4.08 | betaine-homocysteine methyltransferase 2                                                    | Bhmt2         |
| 102799_at   | -4.09 | complement component 4 binding protein                                                      | C4bp          |
| 103786_at   | -4.11 | hypothetical protein 9130208G10                                                             | 9130208G10    |
| 95603_at    | -4.11 | DNA segment, Chr 19, Wayne State University 57, expressed                                   | D19Wsu57e     |
| 100967_at   | -4.12 | solute carrier family 27 (fatty acid transporter), member 2                                 | Slc27a2       |
| 98549_at    | -4.12 | vitronectin                                                                                 | Vtn           |
| 101532_g_at | -4.12 | aldolase 2, B isoform                                                                       | Aldo2         |
| 101844_at   | -4.13 | peroxisomal sarcosine oxidase                                                               | Pso           |
| 102961_at   | -4.14 | expressed sequence AW413091                                                                 | AW413091      |
| 161827_f_at | -4.17 | hemopexin                                                                                   | Hpxn          |
| 104086_at   | -4.19 | RIKEN cDNA 1200014D15 gene                                                                  | 1200014D15Rik |
| 99197_at    | -4.19 | group specific component                                                                    | Gc            |
| 96787_at    | -4.19 | hypothetical protein MGC25863                                                               | MGC25863      |
| 102084_f_at | -4.21 | cytochrome P450, 2c38                                                                       | Cyp2c38       |
| 100329_at   | -4.21 | serine protease inhibitor 1-4                                                               | Spi1-4        |
| 160481_at   | -4.23 | phosphoenolpyruvate carboxykinase 1, cytosolic                                              | Pck1          |
| 103357_at   | -4.23 | solute carrier family 2 (facilitated glucose transporter), member 2                         | Slc2a2        |
| 102806_g_at | -4.24 | CEA-related cell adhesion molecule 1                                                        | Ceacam1       |
| 93354_at    | -4.24 | apolipoprotein C-I                                                                          | Apoc1         |
| 98137_at    | -4.25 | carbonic anhydrase 5a, mitochondrial                                                        | Car5a         |
| 96074_at    | -4.25 | expressed sequence AI255964                                                                 | AI255964      |
| 93771_at    | -4.27 | gap junction membrane channel protein beta 1                                                | Gjb1          |
| 96895_at    | -4.28 | paraoxonase 1                                                                               | Pon1          |
| 103649_at   | -4.28 | hydroxyacid oxidase (glycolate oxidase) 3                                                   | Hao3          |
| 94049_at    | -4.29 | betaine-homocysteine methyltransferase                                                      | Bhmt          |
| 160674_at   | -4.32 | transferrin receptor 2                                                                      | Trfr2         |
| 98123_at    | -4.33 | kynurenine aminotransferase II                                                              | Kat2          |
| 161815_f_at | -4.34 | major urinary protein 1                                                                     | Mup1          |
| 94318_at    | -4.34 | apolipoprotein H                                                                            | ApoH          |
| 93096_at    | -4.36 | RIKEN cDNA 3010002H13 gene                                                                  | 3010002H13Rik |
| 97435_at    | -4.39 | coagulation factor XIII, beta subunit                                                       | F13b          |
| 93251_at    | -4.39 | 4-nitrophenylphosphatase domain and non-neuronal SNAP25-like protein homolog 1 (C. elegans) | Nipsnap1      |
| 96748_i_at  | -4.40 | RIKEN cDNA 9130011B11 gene                                                                  | 9130011B11Rik |
| 96789_i_at  | -4.43 | RIKEN cDNA A530057M15 gene                                                                  | A530057M15Rik |
| 101891_at   | -4.46 | hydroxysteroid (17-beta) dehydrogenase 2                                                    | Hsd17b2       |
| 161924_f_at | -4.47 | apolipoprotein A-II                                                                         | Apoa2         |
| 102284_at   | -4.48 | mannan-binding lectin serine protease 1                                                     | Masp1         |
| 103407_at   | -4.49 | RIKEN cDNA 1300017J02 gene                                                                  | 1300017J02Rik |
| 104507_g_at | -4.50 | nuclear receptor subfamily 1, group I, member 3                                             | Nr1i3         |
| 101103_at   | -4.52 | cytochrome P450, 4a14                                                                       | Cyp4a14       |
| 92606_at    | -4.53 | urate oxidase                                                                               | Uox           |
| 96796_f_at  | -4.54 | UDP-glucuronosyltransferase 2 family, member 5                                              | Ugt2b5        |
| 93974_at    | -4.57 | RIKEN cDNA 1300002F13 gene                                                                  | 1300002F13Rik |
| 97216_at    | -4.57 | pregnancy zone protein                                                                      | Pzp           |
| 98467_at    | -4.57 | inter alpha-trypsin inhibitor, heavy chain 4                                                | Itih4         |
| 98962_at    | -4.58 | lipase, hepatic                                                                             | Lipc          |
| 96713_at    | -4.58 | 3'-phosphoadenosine 5'-phosphosulfate synthase 2                                            | Papss2        |
| 101910_f_at | -4.61 | major urinary protein 1                                                                     | Mup1          |
| 94539_f_at  | -4.62 | cytochrome P450, 2d9                                                                        | Cyp2d9        |
| 101887_at   | -4.64 | angiotensinogen                                                                             | Agt           |
| 96867_at    | -4.65 | alpha-2-glycoprotein 1, zinc                                                                | Azgp1         |
| 96094_at    | -4.65 | apolipoprotein A-I                                                                          | Apoa1         |
| 101912_at   | -4.66 | RIKEN cDNA 1100001G20 gene                                                                  | 1100001G20Rik |
| 104726_at   | -4.66 | RIKEN cDNA 1700013L23 gene                                                                  | 1700013L23Rik |
| 95585_at    | -4.66 | protein C                                                                                   | Proc          |
| 97335_at    | -4.67 | T-cell immunoglobulin and mucin domain containing 2                                         | Timd2         |
| 98612_at    | -4.69 | cytochrome P450, 2d10                                                                       | Cyp2d10       |
| 98116_at    | -4.71 | hemopexin                                                                                   | Hpxn          |
| 101909_f_at | -4.73 | major urinary protein 3                                                                     | Mup3          |
| 101474_at   | -4.73 | mannose binding lectin, liver (A)                                                           | Mbl1          |
| 104344_at   | -4.73 | kallikrein B, plasma 1                                                                      | Klkb1         |
| 94075_at    | -4.73 | fatty acid binding protein 1, liver                                                         | Fabp1         |
| 98582_at    | -4.75 | Mus musculus, Similar to homogentisate 1, 2-dioxygenase, clone IMAGE:4974534, mRNA          |               |



|             |       |                                                                                                        |               |
|-------------|-------|--------------------------------------------------------------------------------------------------------|---------------|
| 93625_at    | -4.76 | alanine-glyoxylate aminotransferase                                                                    | Agxt          |
| 96828_at    | -4.77 | glycine N-methyltransferase                                                                            | Gnmt          |
| 92556_at    | -4.78 | hydroxysteroid (17-beta) dehydrogenase 5                                                               | Hsd17b5       |
| 104421_at   | -4.80 | flavin containing monooxygenase 3                                                                      | Fmo3          |
| 96868_at    | -4.80 | fibrinogen, B beta polypeptide                                                                         | Fgb           |
| 96846_at    | -4.84 | serine (or cysteine) proteinase inhibitor, clade C (antithrombin), member 1                            | Serpinc1      |
| 103023_at   | -4.86 | lecithin cholesterol acyltransferase                                                                   | Lcat          |
| 101572_f_at | -4.89 | serine protease inhibitor 1-1                                                                          | Spi1-1        |
| 161626_f_at | -4.92 | plasminogen                                                                                            | Plg           |
| 99056_at    | -4.94 | 6-pyruvoyl-tetrahydropterin synthase/dimerization cofactor of hepatocyte nuclear factor 1 alpha (TCF1) | Pcbd          |
| 96334_f_at  | -4.95 | cytochrome P450, 2c40                                                                                  | Cyp2c40       |
| 97887_at    | -5.00 | apolipoprotein C-II                                                                                    | Apoc2         |
| 101553_at   | -5.03 | fibrinogen, alpha polypeptide                                                                          | Fga           |
| 102329_at   | -5.03 | cell death-inducing DNA fragmentation factor, alpha subunit-like effector B                            | Cideb         |
| 94563_at    | -5.06 | afamin                                                                                                 | Afm           |
| 104182_at   | -5.09 | hepatocyte growth factor activator                                                                     | Hgfac         |
| 94540_at    | -5.13 | RIKEN cDNA 1300006E06 gene                                                                             | 1300006E06Rik |
| 101635_f_at | -5.13 | major urinary protein 5                                                                                | Mup5          |
| 97288_at    | -5.19 | PDZ domain containing 1                                                                                | Pdzk1         |
| 102096_f_at | -5.22 | major urinary protein 1                                                                                | Mup1          |
| 100436_at   | -5.22 | orosomucoid 1                                                                                          | Orm1          |
| 101287_s_at | -5.23 | cytochrome P450, 2d10                                                                                  | Cyp2d10       |
| 99927_at    | -5.24 | complement component factor i                                                                          | Cfi           |
| 100002_at   | -5.33 | inter-alpha trypsin inhibitor, heavy chain 3                                                           | Itih3         |
| 101463_at   | -5.34 | apolipoprotein C-IV                                                                                    | Apoc4         |
| 104213_at   | -5.41 | RIKEN cDNA 1700124F02 gene                                                                             | 1700124F02Rik |
| 103794_i_at | -5.42 | T-cell immunoglobulin and mucin domain containing 2                                                    | Timd2         |
| 102662_at   | -5.44 | asialoglycoprotein receptor 2                                                                          | Asgr2         |
| 101928_at   | -5.47 | serine (or cysteine) proteinase inhibitor, clade F, member 2                                           | Serpinf2      |
| 100069_at   | -5.51 | cytochrome P450, 2f2                                                                                   | Cyp2f2        |
| 103882_at   | -5.52 | carboxypeptidase N, polypeptide 1                                                                      | Cpn1          |
| 96092_at    | -5.53 | haptoglobin                                                                                            | Hp            |
| 95439_at    | -5.53 | arylacetamide deacetylase (esterase)                                                                   | Aadac         |
| 94987_at    | -5.57 | phosphatidylethanolamine N-methyltransferase                                                           | Pemt          |
| 104328_at   | -5.64 | aquaporin 9                                                                                            | Aqp9          |
| 102291_at   | -5.70 | coagulation factor IX                                                                                  | F9            |
| 103702_i_at | -5.78 | RIKEN cDNA C730048C13 gene                                                                             | C730048C13Rik |
| 103982_s_at | -5.83 | alcohol dehydrogenase 4 (class II), pi polypeptide                                                     | Adh4          |
| 100437_g_at | -5.86 | orosomucoid 1                                                                                          | Orm1          |
| 104424_at   | -5.86 | complement component 9                                                                                 | C9            |
| 92509_at    | -5.86 | coagulation factor XII (Hageman factor)                                                                | F12           |
| 101985_at   | -5.88 | plasminogen                                                                                            | Plg           |
| 99941_at    | -5.89 | esterase 31                                                                                            | Es31          |
| 100078_at   | -5.90 | apolipoprotein A-IV                                                                                    | Apoa4         |
| 94392_f_at  | -6.03 | angiogenin                                                                                             | Ang           |
| 98423_at    | -6.05 | gap junction membrane channel protein beta 2                                                           | Gjb2          |
| 95552_at    | -6.20 | deiodinase, iodothyronine, type I                                                                      | Dio1          |
| 98014_at    | -6.25 | inter-alpha trypsin inhibitor, heavy chain 1                                                           | Itih1         |
| 97680_at    | -6.36 | murinoglobulin, pseudogene 1                                                                           | Mug-ps1       |
| 93433_s_at  | -6.36 | asialoglycoprotein receptor 1                                                                          | Asgr1         |
| 94393_r_at  | -6.42 | elongation of very long chain fatty acids (FEN1/Elo2, SUR4/Elo3, yeast)-like 2                         | Elovl2        |
| 104072_at   | -6.53 | serum amyloid P-component                                                                              | Apcs          |
| 93097_at    | -6.54 | arginase 1, liver                                                                                      | Arg1          |
| 103452_at   | -6.57 | proline dehydrogenase (oxidase) 2                                                                      | Prodh2        |
| 103689_at   | -6.59 | ATP-binding cassette, sub-family C (CFTR/MRP), member 3                                                | Abcc3         |
| 101639_r_at | -6.66 | cytochrome P450, 3a16                                                                                  | Cyp3a16       |
| 102973_f_at | -6.74 | murinoglobulin 2                                                                                       | Mug2          |
| 96326_at    | -6.99 | tyrosine aminotransferase                                                                              | Tat           |
| 104024_at   | -7.12 | cytochrome P450, 3a25                                                                                  | Cyp3a25       |
| 100341_g_at | -7.12 | solute carrier family 10 (sodium/bile acid cotransporter family), member 1                             | Slc10a1       |
| 99269_g_at  | -7.30 | tryptophan 2,3-dioxygenase                                                                             | Tdo2          |
| 160951_at   | -7.33 | RIKEN cDNA 4632419J12 gene                                                                             | 4632419J12Rik |
| 92837_f_at  | -7.43 | murinoglobulin 1                                                                                       | Mug1          |
| 95729_at    | -7.63 | apolipoprotein A-V                                                                                     | Apoa5         |

92590\_at -7.74 3-hydroxy-3-methylglutaryl-Coenzyme A synthase 2 Hmgcs2

**Significantly changed in NM PLT versus WT PLT**

| Affy ID#    | Fold Change | Gene Name                                                                    | Gene Symbol   |
|-------------|-------------|------------------------------------------------------------------------------|---------------|
| 97786_at    | 3.68        | ankyrin repeat domain 2 (stretch responsive muscle)                          | Ankrd2        |
| 103084_at   | 2.59        | cysteine-rich protein 3                                                      | Csrp3         |
| 97990_at    | 2.40        | myosin heavy chain 11, smooth muscle                                         | Myh11         |
| 100555_at   | 2.17        | Down syndrome critical region homolog 1 (human)                              | Dscr1         |
| 96075_at    | 2.07        | WD repeat domain 1                                                           | Wdr1          |
| 102213_at   | 1.94        | cardiac morphogenesis                                                        | Xin           |
| 160695_i_at | 1.94        | homer homolog 2 (Drosophila)                                                 | Homer2        |
| 100554_at   | 1.94        | PDZ and LIM domain 1 (elfin)                                                 | Pdlim1        |
| 103369_at   | 1.94        | RIKEN cDNA 9430029L20 gene                                                   | 9430029L20Rik |
| 98561_at    | 1.82        | troponin I, skeletal, slow 1                                                 | Tnni1         |
| 98596_s_at  | 1.81        | sialyltransferase 9 (CMP-NeuAc:lactosylceramide alpha-2,3-sialyltransferase) | Siat9         |
| 160801_at   | 1.80        | RIKEN cDNA 2310009N05 gene                                                   | 2310009N05Rik |
| 104345_at   | 1.80        | exocyst component protein homolog (S. cerevisiae)                            | Exo70         |
| 103574_at   | 1.72        | Mus musculus, clone IMAGE:5401801, mRNA                                      |               |
| 101383_at   | 1.71        | troponin T1, skeletal, slow                                                  | Tnnt1         |
| 94524_at    | 1.70        | death associated protein 3                                                   | Dap3          |
| 101063_at   | 1.69        | troponin C, cardiac/slow skeletal                                            | Tnnc          |
| 93736_at    | 1.65        | transcobalamin 2                                                             | Tcn2          |
| 161111_f_at | 1.61        | desert hedgehog                                                              | Dhh           |
| 101093_at   | 1.58        | procollagen, type IV, alpha 1                                                | Col4a1        |
| 104634_at   | 1.58        | LIM and senescent cell antigen-like domains 1                                | Lims1         |
| 103006_at   | 1.58        | activating transcription factor 5                                            | Atf5          |
| 98402_at    | 1.57        | Fas-associated factor 1                                                      | Faf1          |
| 102215_at   | 1.57        | carnitine deficiency-associated gene expressed in ventricle 1                | Cdv1          |
| 161184_f_at | 1.56        | tyrosine kinase receptor 1                                                   | Tie1          |
| 103526_at   | 1.55        | peptidyl arginine deiminase, type II                                         | Padi2         |
| 104633_at   | 1.55        | disabled homolog 2 (Drosophila)                                              | Dab2          |
| 96167_at    | 1.55        | Bcl2-associated athanogene 3                                                 | Bag3          |
| 99637_at    | 1.55        | procollagen, type XV                                                         | Col15a1       |
| 99570_s_at  | 1.55        | ATPase, Ca <sup>++</sup> transporting, cardiac muscle, slow twitch 2         | Atp2a2        |
| 101805_f_at | 1.54        | nuclear factor, interleukin 3, regulated                                     | Nfil3         |
| 95531_at    | 1.53        | RIKEN cDNA E230009N18 gene                                                   | E230009N18Rik |
| 103824_at   | 1.52        | Wolfram syndrome 1 homolog (human)                                           | Wfs1          |
| 96245_at    | 1.51        | DNA segment, Chr 11, ERATO Doi 619, expressed                                | D11Ert619e    |
| 96027_at    | 1.51        | RIKEN cDNA 1200014H24 gene                                                   | 1200014H24Rik |
| 101931_at   | 1.51        | phosphatidylserine synthase 1                                                | Ptdss1        |
| 97241_at    | 1.50        | hypothetical protein MGC6696                                                 | MGC6696       |

**Significantly changed in NM EDL versus WT EDL**

| Affy ID#  | Fold Change | Gene Name                                                | Gene Symbol   |
|-----------|-------------|----------------------------------------------------------|---------------|
| 100472_at | 2.59        | enabled homolog (Drosophila)                             | Enah          |
| 100988_at | 1.74        | BCL2-like 11 (apoptosis facilitator)                     | Bcl2l11       |
| 93050_at  | 1.73        | myosin light chain, phosphorylatable, cardiac ventricles | Mylpc         |
| 97380_at  | 1.58        | RIKEN cDNA 1700016A15 gene                               | 1700016A15Rik |

**Table S2:** Significantly changed (i.e., disease-associated) transcripts altered in two or more of the five muscle types. Red indicates positive fold changes in the transgenic tissues. Green symbols indicate genes down regulated in DIA but up regulated in the other muscle. Shaded cells are used to highlight genes in common across multiple different muscle type comparisons.

| TA & GAS | TA & DIA  | TA & PLT | TA & EDL | GAS & DIA | GAS & PLT | GAS & EDL | DIA & PLT | DIA & EDL | PLT & EDL |
|----------|-----------|----------|----------|-----------|-----------|-----------|-----------|-----------|-----------|
| Ankrd2   | Ankrd2    | Ankrd2   | Myl2     | Ankrd2    | Ankrd2    | -         | Ankrd2    | -         | -         |
| Csrp3    | Csrp3     | Tnnc1    | Enah     | Csrp3     | Csrp3     |           | Csrp3     |           |           |
| Cmya1    | Padi2     | Csrp3    |          | Dusp6     | Cmya1     |           | Padi2     |           |           |
| Bag3     | Nrap      | Atp2a2   |          |           | Bag3      |           | Dab2      |           |           |
| Pdcd7    | Hspa1l    | St3gal5  |          |           |           |           | Dhh       |           |           |
|          | Prp19     | Tnni1    |          |           |           |           |           |           |           |
|          | Gabarapl1 | Pdim1    |          |           |           |           |           |           |           |
|          | Strbp     | Padi2    |          |           |           |           |           |           |           |
|          | Ndst1     | Cmya1    |          |           |           |           |           |           |           |
|          | Copg      | Wfs1     |          |           |           |           |           |           |           |
|          | Gclm      | Dscr1    |          |           |           |           |           |           |           |
|          |           | Pqlc1    |          |           |           |           |           |           |           |
|          |           | Amot     |          |           |           |           |           |           |           |
|          |           | Macf1    |          |           |           |           |           |           |           |
|          |           | Lims1    |          |           |           |           |           |           |           |
|          |           | Wdr1     |          |           |           |           |           |           |           |
|          |           | Bag3     |          |           |           |           |           |           |           |
|          |           | Ablim1   |          |           |           |           |           |           |           |
|          |           | Ddx56    |          |           |           |           |           |           |           |

**Table S3.**  $\alpha\text{Tm}_{\text{slow}}$  protein expression and percentage of rod containing fibers in nemaline muscles<sup>a</sup>.

| Muscle            | $\alpha\text{Tm}_{\text{slow}}$ (WT + Met9Arg) protein<br>(% total Tm expression) | % Rod Containing Fibers |
|-------------------|-----------------------------------------------------------------------------------|-------------------------|
| Diaphragm         | $35.5 \pm 2.7^b$                                                                  | 47% <sup>b</sup>        |
| EDL               | $20.2 \pm 3.0^b$                                                                  | 38% <sup>b</sup>        |
| Gastrocnemius     | $24.8 \pm 4.4$                                                                    | 3%                      |
| Plantaris         | $27.4 \pm 2.8$                                                                    | 10%                     |
| Tibialis Anterior | $25.9 \pm 6.6^b$                                                                  | 15% <sup>b</sup>        |

<sup>a</sup>The mean percentage of the total  $\alpha\text{Tm}_{\text{slow}}$  protein [WT (wild type) +  $\alpha\text{Tm}_{\text{slow}}$ (Met9Arg)]  $\pm$  SEM expressed in the muscles listed from at least 3 mice from HSA- $\alpha\text{Tm}_{\text{slow}}$ (Met9Arg) line 4. The contribution of  $\alpha\text{Tm}_{\text{slow}}$ (Met9Arg) protein to total  $\alpha\text{Tm}_{\text{slow}}$  protein in each muscle is estimated at  $\geq 93\%$  based on fiber type composition in the various muscles. Of the muscles examined, diaphragm has the greatest number of slow fibers with 7% slow fibers (38). Statistical significance was determined by two-tailed t test assuming unequal variances.

<sup>b</sup>Values reported previously (37). Protein gel analysis to determine  $\alpha\text{Tm}_{\text{slow}}$  content was as described in (37). Percent rod containing fibers were determined as described in Corbett *et al.* (12).
